**The genome of *Drosophila innubila* reveals lineage-specific patterns of selection in immune genes**

Tom Hill<sup>1\*</sup>, Boryana S. Koseva<sup>2</sup>, Robert L. Unckless<sup>1</sup>

1. 4055 Haworth Hall, The Department of Molecular Biosciences, University of Kansas, 1200 Sunnyside Avenue, Lawrence, KS 66045. Email: tom.hill@ku.edu

2. 3005 Haworth Hall, K-INBRE Bioinformatics Core, University of Kansas, 1200 Sunnyside Avenue, Lawrence, KS 66045

\* Corresponding author

## 1 **Abstract**

2 Pathogenic microbes can exert extraordinary evolutionary pressure on their hosts. They can spread  
3 rapidly and sicken or even kill their host to promote their own proliferation. Because of this strong  
4 selective pressure, immune genes are some of the fastest evolving genes across metazoans, as  
5 highlighted in mammals and insects. *Drosophila melanogaster* serves as a powerful model for  
6 studying host/pathogen evolution. While *Drosophila melanogaster* are frequently exposed to  
7 various pathogens, little is known about *D. melanogaster*'s ecology, or if they are representative  
8 of other *Drosophila* species in terms of pathogen pressure. Here, we characterize the genome of  
9 *Drosophila innubila*, a mushroom-feeding species highly diverged from *D. melanogaster* and  
10 investigate the evolution of the immune system. We find substantial differences in the rates of  
11 evolution of immune pathways between *D. innubila* and *D. melanogaster*. Contrasting what was  
12 previously found for *D. melanogaster*, we find little evidence of rapid evolution of the antiviral  
13 RNAi genes and high rates of evolution in the Toll pathway. This suggests that, while immune  
14 genes tend to be rapidly evolving in most species, the specific genes that are fastest evolving may  
15 depend either on the pathogens faced by the host and/or divergence in the basic architecture of the  
16 host's immune system.

17

## 18 **Introduction**

19 Pathogens are a substantial burden to nearly every species on the planet, providing a strong  
20 selective pressure for individuals experiencing infection to evolve resistance. There is considerable  
21 evidence for selection acting on genes involved in resistance to this pathogenic burden, as  
22 highlighted by several studies across Metazoans (Kimbrell and Beutler 2001; Enard et al. 2016)  
23 including *Drosophila* (Sackton et al. 2007; Obbard et al. 2009). Much work concerning the  
24 evolution of the invertebrate immune system has focused on the *D. melanogaster*. While pathogen  
25 pressure is ubiquitous, the diversity of pathogens that hosts face and the selection for resistance  
26 they trigger vary tremendously (Sackton et al. 2007; Hetru and Hoffmann 2009; Sackton et al.  
27 2009; Merklung and van Rij 2013; Martinez et al. 2014; Hanson et al. 2016; Martinson et al. 2017;  
28 Palmer, et al. 2018a). So, while it is abundantly clear that immune genes are often among the  
29 fastest evolving genes in the genome (Obbard et al. 2006; Sackton et al. 2007; Obbard et al. 2009;  
30 Enard et al. 2016; Shultz and Sackton 2019), it is less clear whether the same genes are fast  
31 evolving in species that are genetically, geographically and/or ecologically diverged.

32           Based on genetic work, a number of pathways have been implicated in immune response  
33 based on work in *D. melanogaster* (Hoffmann 2003). Three of these pathways are Toll, IMD and  
34 JAK-STAT, implicated in the defense response to gram-positive bacteria and Fungi, defense  
35 response to Gram-Negative Bacteria, and general stress response respectively (Ekengren and  
36 Hultmark 2001; Hoffmann 2003; Hultmark 2003; Hetru and Hoffmann 2009; Darren J. Obbard et  
37 al. 2009). In all three pathways, several genes are found to be rapidly evolving, likely due to  
38 Host/parasite arms races (Obbard et al. 2006; Sackton et al. 2007; Darren J. Obbard et al. 2009;  
39 Sackton et al. 2009). In fact, orthologs of some effector molecules in these pathways are difficult  
40 to identify due to their rapid evolution (Ekengren and Hultmark 2001; Sackton et al. 2007; West  
41 and Silverman 2018).

42           In *D. melanogaster* and several members of the *Sophophora* subgenus, the canonical  
43 antiviral RNA interference (RNAi) genes are some of the fastest evolving genes in the genome,  
44 and are the focus of many studies of the evolution of antiviral pathways (Obbard et al. 2006;  
45 Obbard et al. 2009; Palmer et al. 2018a). These studies suggest that viruses, specifically RNA  
46 viruses, are a major selective pressure in *D. melanogaster*, requiring a rapid evolutionary response  
47 from the host (Obbard et al. 2006; Obbard et al. 2009; Daugherty and Malik 2012; Palmer et al.  
48 2018b). The primary antiviral pathway characterized in *D. melanogaster* is an RNA interference  
49 system, which uses small interfering RNAs (siRNA), generated from double stranded viral  
50 messenger RNAs (mRNAs) and Argonaute-family proteins (Hutvagner and Simard 2008; Sabin  
51 et al. 2009), to bind complimentary sequences and degrade them, preventing their use as a  
52 translation template and stopping viral replication (Wang et al. 2006; Obbard et al. 2009; Ding  
53 2010). Importantly, these pathways have mostly been validated only in *D. melanogaster*, therefore,  
54 a broader view of antiviral immune gene evolution across *Drosophila* is warranted.

55           One particular group in the *Drosophila* genus with a rich history of ecological study, and  
56 with great potential as a host/pathogen study system, is the quinaria group (Jaenike and Perlman  
57 2002; Perlman et al. 2003; Dyer et al. 2005; Jaenike and Dyer 2008; Unckless 2011; Unckless and  
58 Jaenike 2011). This species group is mostly mycophagous, found developing and living on the  
59 fruiting bodies of several (sometimes toxic) mushrooms. These mushrooms are commonly  
60 inhabited by parasitic nematode worms, trypanosomes and a host of parasitic microbes (Dyer et  
61 al. 2005; Martinson et al. 2017) which are likely significant pathogenic burdens, requiring a strong  
62 immune response. One member of the quinaria group of particular interest concerning

63 host/pathogen coevolution is *Drosophila innubila* (Patterson and Stone 1949). While many species  
64 in the quinaria group are broadly dispersed across temperate forests (including the sister species  
65 *D. falleni* and outgroup species *D. phalerata*) (Patterson and Stone 1949; Markow and O’Grady  
66 2006), *Drosophila innubila*, is limited to the “Sky Islands”, montane forests and woodlands  
67 southwestern USA and Mexico. It likely colonized the mountains during the previous glaciation  
68 period, 10 to 100 thousand years ago (Patterson and Stone 1949; Jaenike et al. 2003). The flies are  
69 restricted to elevations of 900 to 1500m, and are active only during the rainy season (late July to  
70 September) (Jaenike et al. 2003). *D. innubila* is also the only species in the quinaria group  
71 frequently (25-46% in females) infected by a male-killing *Wolbachia* strain (*wInn*), leading to  
72 female biased sex-ratios (Dyer 2004). This *Wolbachia* is closely related to *wMel*, which infects *D.*  
73 *melanogaster* (but does not kill males) (Jaenike et al. 2003). Interestingly, *D. innubila* is also  
74 frequently (35-56%, n > 84) infected by *Drosophila innubila* Nudivirus (DiNV), thought to have  
75 spread to *D. innubila* during their expansion in the glaciation period (Unckless 2011; Hill and  
76 Unckless 2017). In contrast, DiNV is found at lower frequencies in *D. innubila*’s sister species, *D.*  
77 *falleni* (0-3%, n = 95) and undetected in the outgroup species, *D. phalerata* (0%, n = 7) (Unckless  
78 2011). DiNV reduces both lifespan and fecundity of infected hosts (Unckless 2011), with related  
79 viruses also causing larval lethality (Payne 1974; Wang and Jehle 2009). When infected with a  
80 similar DNA virus (Kallithea virus), *Drosophila melanogaster* show a standard antiviral immune  
81 response, including the induction of the antiviral siRNA pathway along with other identified  
82 antiviral pathways (Palmer et al. 2018a; Palmer et al. 2018b). Thus, despite lacking the genomic  
83 resources of *D. melanogaster*, *D. innubila* and *D. falleni* are potentially useful model systems to  
84 understand the evolution of the immune system to identify if the signatures of selection are  
85 conserved across pathways between the highly genetically and ecologically diverged melanogaster  
86 and quinaria groups. Like *D. melanogaster* (Sackton et al. 2007; Obbard et al. 2009), genes  
87 involved in immune defense will be rapidly evolving in this species group. Though the difference  
88 in pathogen pressure may affect which pathways are rapidly evolving.

89 These results suggest species with different pathogenic burdens may have different rates  
90 of immune evolution. To this end, we surveyed the evolutionary divergence of genes within a trio  
91 of closely related mycophagous *Drosophila* species (*D. innubila*, *D. falleni* and *D. phalerata*). As  
92 a first step, we sequenced and assembled the genome of *D. innubila*, resulting in an assembly  
93 which is on par with the *Drosophila* benchmark, *D. melanogaster* release 6 (Dos Santos et al.

94 2015). Using short read alignments to *D. innubila* of two closely-related species (*D. falleni* and *D.*  
95 *phalerata*), we found evidence of selective constraint on the antiviral RNAi pathway, but rapid  
96 evolution of genes in several other immune pathways, including several conserved broad immune  
97 pathways such as the Toll and JAK-STAT pathways. These suggest that pathogen pressure  
98 differences may lead to drastic differences in immune evolution, or environmental changes may  
99 cause differences in general stress response and developmental pathways.

100

## 101 **Results**

### 102 *Genome sequencing and assembly*

103 *D. innubila* is a mushroom-feeding species found across the sky islands of the South-Western USA  
104 and Western Mexico (Patterson and Stone 1949). It is in the quinaria group of the *Drosophila*  
105 subgenus, approximately 50 million years diverged from the research workhorse, *D. melanogaster*  
106 (Dyer 2004; Markow and O'Grady 2006). *D. innubila* has a sister species in northern North  
107 America, *D. falleni*, and the pair share an old-world outgroup species, *D. phalerata*. These species  
108 are highly diverged from all other genome-sequenced *Drosophila* species and represent a  
109 genomically understudied group of the *Drosophila* subgenus (Jaenike et al. 2003; Markow and  
110 O'Grady 2006).

111 We sequenced and assembled the genome of *D. innubila* using a combination of MinION  
112 long reads with HiC scaffolding (Oxford Nanopore Technologies Inc., Oxford, UK), and Illumina  
113 short reads for error correcting (Illumina, San Diego, CA) (Figure 1A, Table 1; NCBI accession:  
114 SKCT000000000). The genome is 168 Mbp with 50% of the genome represented in scaffolds  
115 29.59Mbp or longer (N50=29.59Mbp), eclipsing release 6 of *D. melanogaster* (N50=25.29Mb,  
116 (Clark et al. 2007; Dos Santos et al. 2015; Gramates et al. 2017). Additionally, the *D. innubila*  
117 N90 is 25.98Mbp compared to 23.51Mbp in *D. melanogaster*. At this quality of assembly, the N50  
118 and N90 statistics are approaching full chromosome lengths in *Drosophila* and therefore likely do  
119 not represent how contiguous the assembly is, given the genome of interest. To better discern  
120 between the quality of assemblies, we calculated the proportion of the entire genome found in the  
121 six largest contigs (for the six *Drosophila* Muller elements) for each reference genome. In *D.*  
122 *innubila*, 97.71% of the genome is found in these six largest contigs, compared to 95.99% of the  
123 *D. melanogaster* genome (Supplementary Tables 1-3).

124

125 **Table 1: Genome Summary.** Summary of the major assembled scaffolds in the *D. innubila*  
 126 genome, including the length in kilobase pairs (kbp), number of genes, number of orphan genes,  
 127 gene lengths in base pairs (bp) and proportion of the scaffold that is repetitive content.

| <b>Scaffold (Muller<br/>element - <i>D.</i><br/><i>melanogaster</i><br/>ortholog - ID)</b> | <b>Total<br/>Length<br/>(kbp)</b> | <b>Total Gene<br/>count</b> | <b>Orphan<br/>count</b> | <b>Mean gene<br/>length (bp)</b> | <b>Mean<br/>repeat<br/>content<br/>(%)</b> |
|--------------------------------------------------------------------------------------------|-----------------------------------|-----------------------------|-------------------------|----------------------------------|--------------------------------------------|
| A-X-3                                                                                      | 40479                             | 2012                        | 73                      | 5090.7                           | 31.7                                       |
| B-2L-4                                                                                     | 29570.5                           | 2249                        | 99                      | 4394.6                           | 13.9                                       |
| B-2L-5                                                                                     | 8037.1                            | 160                         | 13                      | 4679.2                           | 62.9                                       |
| C-2R-1                                                                                     | 25683.3                           | 2518                        | 58                      | 4033.3                           | 12.2                                       |
| C-2R-27                                                                                    | 16.5                              | 0                           | 0                       | NA                               | 92.4                                       |
| D-3L-0                                                                                     | 27707.2                           | 2345                        | 68                      | 4248.1                           | 12.6                                       |
| D-3L-29                                                                                    | 45.7                              | 0                           | 0                       | NA                               | 83.7                                       |
| E-3R-2                                                                                     | 32746.5                           | 2863                        | 73                      | 4092.4                           | 11.4                                       |
| E-3R-11                                                                                    | 18.4                              | 1                           | 1                       | 282                              | 75.6                                       |
| F-4-6                                                                                      | 2027.1                            | 106                         | 7                       | 6992                             | 35.5                                       |
| Unassembled<br>(324 contigs)                                                               | 1163.5                            | 46                          | 1                       | 1429                             | 39.1                                       |
| Mitochondria                                                                               | 16.1                              | 18                          | 0                       | 1658.7                           | 0                                          |
| <b>Total</b>                                                                               | <b>168031</b>                     | <b>12318</b>                | <b>393</b>              | <b>4350.7</b>                    | <b>13.5</b>                                |

128  
 129 **Figure 1: The *D. innubila* genome. A.** A circular summary of the *D. innubila* genome limited to  
 130 the assembled acrocentric chromosomes on ten major scaffolds. The rings (from the outside in)  
 131 are the chromosome identity, the length of each segment, the percentage GC content, the coding  
 132 density, the transposable element density (250 kilobase pairs windows, sliding 250 kilobase pairs),  
 133 and the percentage of each window that aligns to *D. virilis* (250kbp windows, sliding 250kbp). **B.**  
 134 Phylogenetic relationships of *D. innubila*, *D. falleni*, *D. phalerata* and the main lineages of  
 135 *Drosophila* generated using 100 concatenated genes, with 500 bootstraps (shown as % support on  
 136 the nodes).

## A - Genome summary

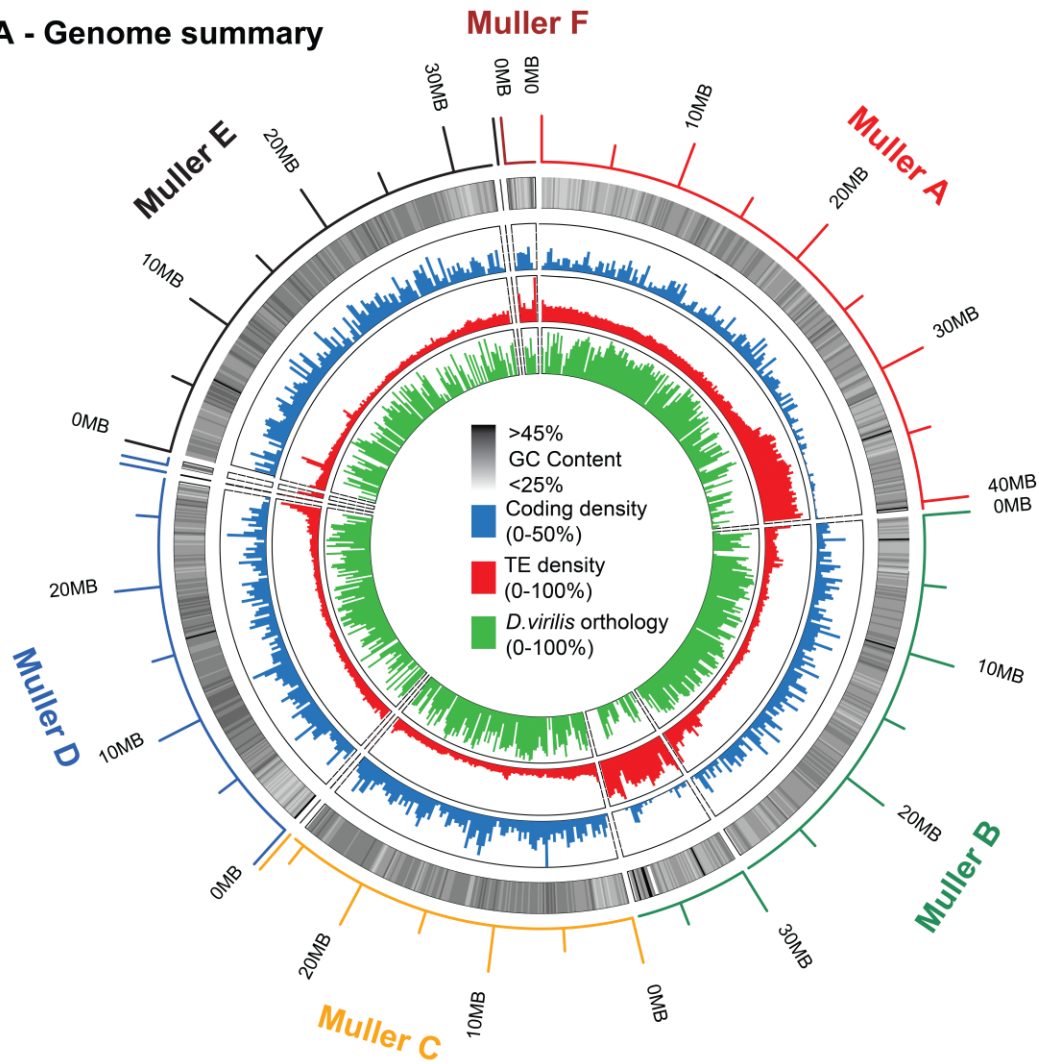

## B - Phylogeny

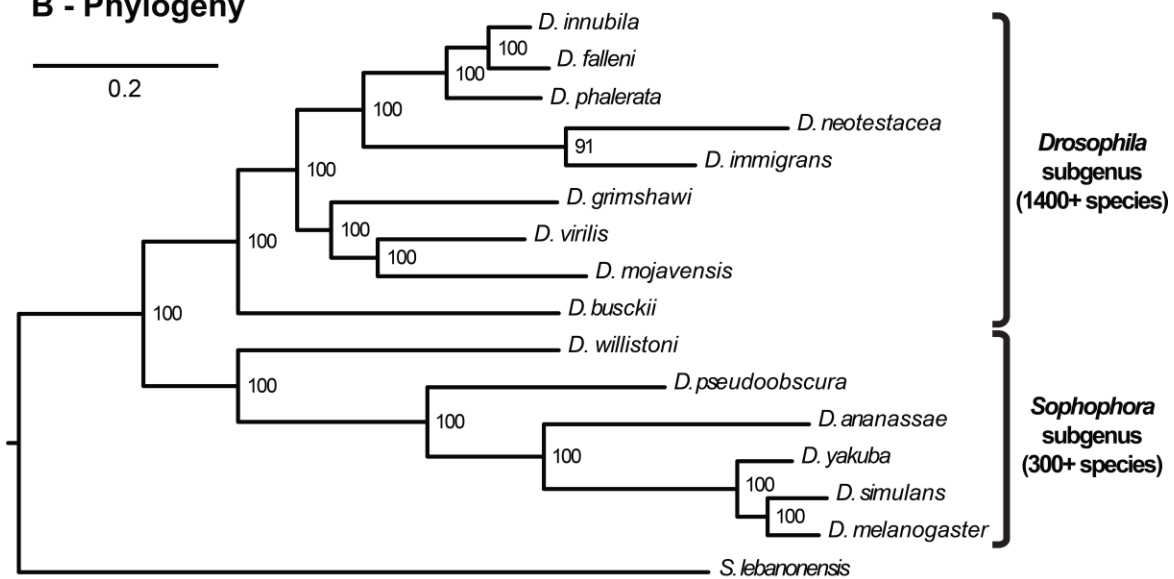

138 Using a combined transcriptome assembly of all life stages and protein databases from  
139 other species, we annotated the genome and found 12,318 genes (including the mitochondrial  
140 genome), with coding sequence making up 11.5% of the genome, at varying gene densities across  
141 the Muller elements (Figure 1A blue, Table 1). Of the annotated genes, 11,925 (96.8%) are shared  
142 with other *Drosophila* species (among the 12 genomes available on Flybase.org), 7,094 (57.6%)  
143 have orthologs in the human genome, and the annotation recovered 97.2% of the Dipteran BUSCO  
144 protein library (Simão et al. 2015). The *D. innubila* genome has an average of 36.57% GC content,  
145 varying across the Muller elements (Figure 1A black/white). Using dnaPipeTE (Goubert et al.  
146 2015), RepeatModeler (Smit and Hubley 2008) and RepeatMasker (Smit and Hubley 2015), we  
147 estimated that 13.53% of the genome consists of transposable elements (TEs, Figure 1A red),  
148 which is low for *Drosophila* (Sessegolo et al. 2016). Using Mauve (Darling et al. 2004) we  
149 compared our assembly to the best assembled genome within the *Drosophila* subgenus, *D. virilis*,  
150 and found that most regions in the *D. innubila* genome have some orthology to the *D. virilis*  
151 reference genome (Figure 1A green). A summary of the assembled genome including codon bias,  
152 TE content, orphan genes, duplications and expression changes across life stages can be found in  
153 the supplementary results (Supplementary Tables 7-20 and Supplementary Figures 4-12).

154

#### 155 *Immune pathways evolve differently in D. innubila and D. melanogaster*

156 We aimed to determine whether evolutionary rates in different functional categories are  
157 conserved across *D. innubila* and *D. melanogaster*, given the genetic and ecological divergence  
158 between the two species (Patterson and Stone 1949; Jaenike et al. 2003; Markow and O'Grady  
159 2006). Using short reads from *D. falleni* and *D. phalerata* mapped to the *D. innubila* genome, we  
160 identified DNA sequence divergence and generated consensus gene sequences for each species.  
161 We then aligned the DNA sequence from each species for each gene to the *D. innubila* ortholog  
162 (PRANK –codon +F) (Löytynoja 2014). For each ortholog set, we identified the proportion of  
163 synonymous ( $dS$ ) substitutions and amino acid changing, non-synonymous substitutions ( $dN$ ) (per  
164 possible synonymous or non-synonymous substitution respectively) occurring on each branch of  
165 the phylogeny (codeML branch based approach, model 0) (Yang 2007; McKenna et al. 2010;  
166 DePristo et al. 2011; Löytynoja 2014). This allowed us to calculate  $dN/dS$  to identify genes  
167 showing signatures of rapid or unconstrained evolution specifically on the *D. innubila* branch of  
168 the tree (elevated  $dN/dS$ , Figure 2A). Conversely, we can also identify genes under strong purifying



169 selection (reduced  $dN/dS$ ) (Yang 2007). We also performed this analysis across the *D.*  
170 *melanogaster* clade using *D. melanogaster*, *D. simulans* and *D. yakuba* reference genomes but  
171 focusing on the *D. melanogaster* branch (Clark et al. 2007; Gramates et al. 2017). These trios are  
172 of similar levels of divergence (Figure 1B), The rate of evolution, as measured by  $dN/dS$ , is  
173 significantly positively correlated between the species across individual genes (species-specific  
174 branch comparison, Spearman rank correlation = 0.6856,  $p$ -value =  $1.52 \times 10^{-06}$ ) and most genes are  
175 under selective constraint; only 25.6% of genes have  $dN/dS$  greater than 0.5 (Figure 2B).

176

177

178 **Figure 2: Toll and antiviral genes evolve differently between *D. melanogaster* and *D.***

179 *innubila*. **A.** The non-synonymous (potentially adaptive) divergence ( $dN$ ) for each gene across  
180 the *D. innubila* genome, compared to the gene's synonymous (neutral) divergence ( $dS$ ). Genes  
181 involved in antiviral and antibacterial (*Toll* and *IMD*) immune signaling pathways are colored.

182 The upper 97.5<sup>th</sup> percentile is shown as a dotted line,  $dN/dS = 1$  is shown as a dashed line. **B.**

183 Comparison of  $dN/dS$  in *D. innubila* and *D. melanogaster*. Toll and antiviral genes are shown for  
184 comparison. The dotted line highlights when *innubila* and *melanogaster*  $dN/dS$  are equal. The  
185 dashed line highlights when  $dN=dS$  in either species. The solid line highlights the spearman  
186 correlation between *D. melanogaster* and *D. innubila*  $dN/dS$ . **C.** Mean  $dN/dS$  for genes within

187 core 116 GOslim categories (Consortium et al. 2000; Carbon et al. 2017) in both *D.*

188 *melanogaster* and *D. innubila*, alongside specific immune and RNAi categories of interest. Bars  
189 are shown giving the standard error for each category in *D. melanogaster* (X-axis) and *D.*

190 *innubila* (Y-axis). Categories are colored by immune categories (red) or background categories

191 (grey), with immune categories of interest highlighted. The fitted line is for all background

192 categories, with immune categories added *post hoc*. **Abbreviations:** *AttD* = *attacin D*, *modSP* =

193 *modular serine protease*, *nec* = *necrotic*, *pst* = *pastrel*, *spz4* = *spaetzle 4*, *vig* = *vasa intronic*

194 *gene*.

195

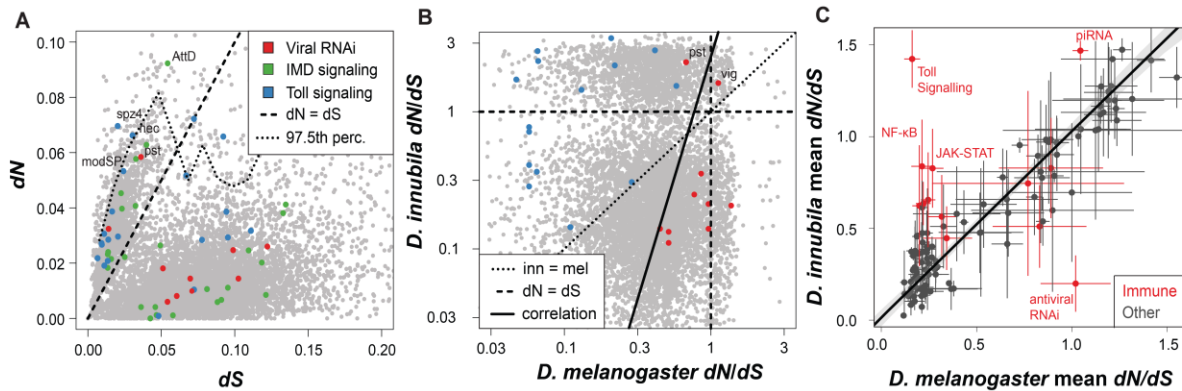

196

197

198

199

200

201

202

203

204

205

206

207

208

209

210

211

212

213

214

215

216

217

218

To determine whether similar classes of genes were under similar selection pressures in the two species, we grouped genes by gene ontology (GO) categories using GOSlim (Consortium et al. 2000; Carbon et al. 2017). There was a significant linear correlation between mean values of GO categories in each species (Figure 2C black points, Spearman rank correlation = 0.847, GLM  $t = 17.01$ ,  $p$ -value =  $4.613 \times 10^{-33}$ ), suggesting that, in general, pathways may be under similar selective pressures (either constrained evolution or positive selection, Figure 2C). We identified GO categories enriched in the top 10% of genes for  $dN/dS$  to find categories evolving rapidly in each species. Several enriched GO immune categories were common to both *D. innubila* and *melanogaster*, including defense response to bacteria and antimicrobial peptide regulation (Supplementary Table 4). However, several GO terms related to Toll signaling were enriched exclusively in *D. innubila*, while gene silencing by RNA and RNA splicing were enriched in *D. melanogaster* but not *D. innubila* (Figure 2B red points, Supplementary Table 4).

We fitted a model to contrast *D. innubila*  $dN/dS$  and *D. melanogaster*  $dN/dS$  per gene and extracted the studentized residuals. We examined the upper 10% of residuals, which should contain genes fast evolving in only *D. innubila*. We found Toll receptor signaling pathways and metabolic processes enriched, among others (Supplementary Table 4, Figure 2B & C,  $p$ -value < 0.000775, though this is not significant after correcting more multiple tests). Conversely, in the lower 10% (which should be genes fast-evolving only in *D. melanogaster*) we found RNAi and response to virus genes enriched (Supplementary Table 4, Figure 2B & C,  $p$ -value < 0.000998, though this is not significant after correcting for multiple tests). These lines of evidence suggested that, while many functional categories are evolving similarly, Toll and antiviral RNAi pathways are evolving

219 quite differently between *D. melanogaster* and *D. innubila* and motivated a more thorough  
220 examination of the differences in the evolution of genes involved in immune defense.

221  
222 *Immune evolution differs between species groups, even after controlling for synonymous*  
223 *divergence*

224 While we found no correlation between  $dN/dS$  and gene length in either species (GLM  $t =$   
225  $0.34$ ,  $p$ -value =  $0.81$ ), we did find a significant negative correlation between  $dN/dS$  and  $dS$  in *D.*  
226 *innubila* (Figure 2A, GLM  $t = -64.94$ ,  $p$ -value =  $2.2 \times 10^{-16}$ ). Most genes with high  $dN/dS$  had lower  
227 values of  $dS$ , possibly due to the short gene branches (and low neutral divergence) between species  
228 inflating the proportion of non-synonymous substitutions (Figure 2A). We also found slightly  
229 different distributions of  $dN/dS$  in each species, suggesting which may cause the differences seen  
230 (Supplementary Figure 1). Because of these effects, we attempted to control for differences by  
231 extracting genes that were in the upper 97.5%  $dN/dS$  of genes per 0.01  $dS$  window and with  $dN/dS$   
232 greater than 1 and labeled these 166 genes as the most rapidly evolving on the *D. innubila* branch.  
233 Contrasting *D. melanogaster* (Obbard et al. 2006), these genes were not enriched for antiviral  
234 RNAi genes and were instead significantly enriched for several metabolic and regulation  
235 pathways, as was found previously (Table 2). The most common type of gene with elevated  $dN/dS$   
236 were those involved in the regulation of the Toll pathway (Table 2, Figure 2 & 3, Supplementary  
237 Table 5, GOrilla FDR  $p$ -value =  $0.00015$  after multiple testing correction, enrichment =  $14.16$ )  
238 (Eden et al. 2009). Specifically, we found four Toll signaling genes; *spatzle4*, *necrotic*, *spheroide*  
239 and *modSP*; were the fastest evolving genes in this pathway, and among the fastest in the genome  
240 (Figure 2A, above the dotted line, Supplementary Table 6). Most of these rapidly evolving genes  
241 are signaling genes, which were, as a class, not particularly fast evolving in the *D. melanogaster*  
242 clade (Sackton et al. 2007). Additionally, *Pp1apha-96A* and *Attacin D*, genes involved in Gram-  
243 negative bacterial response, were rapidly evolving (upper 97.5% of genes,  $dN/dS > 1$ ).

244 Given the differences between species, we compared molecular evolution of genes in each  
245 of immune gene category for the entire *melanogaster* trio (*D. melanogaster*, *simulans* and *yakuba*)  
246 with the evolution of those same genes in the entire *D. innubila* trio (*D. innubila*, *falleni* and  
247 *phalerata*), alongside comparing specifically *D. innubila* and *D. melanogaster*. Because non-  
248 synonymous divergence is elevated in genes with low synonymous divergence on the *D. innubila*  
249 branch but not the *D. melanogaster* branch (Figure 2A, Supplementary Figure 1), we attempted to

250 control for its effect. For each focal immune gene, we extracted genes on the same chromosome  
251 with  $dS$  within 0.01 of the focal gene. We then calculated the differences in the median  $dN/dS$  of  
252 these control genes and the focal genes, for each branch on the tree, and categorized these  
253 differences by immune category based on Flybase gene ontologies (Gramates et al. 2017). We also  
254 separated antiviral genes into those associated with antiviral RNAi and those involved in other  
255 pathways (such as NF- $\kappa$ B signaling molecules). Using this method, we found most immune  
256 categories had slightly positive differences compared to the controls, suggesting faster evolution  
257 than the background (Figure 3A), consistent with results across the entire genus (Sackton et al.  
258 2007). Specifically, the Toll signaling, JAK-STAT, response to Gram-positive infection, response  
259 to Gram-negative infection and other genes associated with resistance to viral infection (Magwire  
260 et al. 2011; Magwire et al. 2012; Palmer et al. 2018a) were significantly higher than the  
261 background in the *D. innubila* trio (Figure 3A, Supplementary Figure 3, Supplementary Table 5,  
262  $t$ -test  $t = 2.39$ ,  $p$ -value  $< 0.05$ , all categories are normally distributed, Shapiro-Wilk test  $p$ -value  $>$   
263  $0.0521$ ). Toll genes also had significantly higher rates of evolution in *D. innubila* than *D.*  
264 *melanogaster* (Wilcoxon Rank Sum Test,  $W = 226$ ,  $p$ -value =  $0.01051$ ). Again, in contrast to *D.*  
265 *melanogaster* (Obbard et al. 2006), there was no significant elevation of the rates of evolution in  
266 antiviral RNAi genes in *D. innubila*, suggesting selective constraint ( $t$ -test  $t = 1.0798$ ,  $p$ -value =  
267  $0.3082$ ). In fact, only one antiviral RNAi gene, *pastrel*, appears to be fast-evolving in *D. innubila*,  
268 with most genes in this category close to the median  $dN/dS$  for the *innubila* genome (Figure 2A,  
269 2B & 3A). Interestingly, *pastrel* is among the slowest evolving antiviral gene in *D. melanogaster*  
270 (though still in the upper 25% of all genes). Variation in *pastrel* has been associated with survival  
271 after *Drosophila C* virus infection (DCV) in *D. melanogaster*, but is not likely involved with  
272 antiviral RNAi (Magwire et al. 2011; Magwire et al. 2012; Barbier 2013).

273

274



287 **Table 2: Gene enrichments.** Gene ontology groups enriched for high  $dN/dS$  on the *D. innubila*  
 288 branch. Table includes the number of genes in each pathway found in the upper 0.25% for  $dN/dS$ ,  
 289 the enrichment of each gene category as well as significance of the category before and after  
 290 multiple testing correction.

| Gene Ontology category                           | No. genes<br>$dN/dS >$<br>0.25% | Total No.<br>genes in<br>GO<br>category | Enrichment | $p$ -value            | $p$ -value (after<br>multiple<br>testing<br>correction) |
|--------------------------------------------------|---------------------------------|-----------------------------------------|------------|-----------------------|---------------------------------------------------------|
| Regulation of the Toll<br>Pathway                | 4                               | 20                                      | 14.16      | $2.62 \times 10^{-8}$ | 0.000153                                                |
| Metabolic Process                                | 160                             | 2317                                    | 1.22       | $6.29 \times 10^{-4}$ | 1                                                       |
| Cellular response to light<br>stimulus           | 5                               | 25                                      | 6.77       | $6.98 \times 10^{-4}$ | 1                                                       |
| Vesicle uncoating                                | 2                               | 2                                       | 33.85      | $8.68 \times 10^{-4}$ | 1                                                       |
| Organic hydroxy<br>compound metabolic<br>process | 9                               | 87                                      | 3.5        | $9.85 \times 10^{-4}$ | 1                                                       |

291

292

293 As  $dN/dS$  may give false signals of rapid evolution due to multiple nucleotide substitutions  
 294 occurring per site (Venkat et al. 2018), we calculated  $\delta$  (another measurement of the rate of  
 295 evolution) using a method that controls for multi-nucleotide substitutions in a single site (Pond et  
 296 al. 2005; Venkat et al. 2018).  $\delta$  was broadly positively correlated with  $dN/dS$  in both species  
 297 (Spearman correlation = 0.17,  $p$ -value = 0.0192). Using this method, we corroborated our previous  
 298 finding that antiviral genes are rapidly evolving exclusively in the *D. melanogaster* trio compared  
 299 to the background (Supplementary Figure 2, GLM  $t = 4.398$ ,  $p$ -value =  $1.1 \times 10^{-05}$ ), while bacterial  
 300 response genes (both Gram-positive and -negative) are rapidly evolving only in the *D. innubila*  
 301 trio compared to the background (Supplementary Figure 2, GLM  $t > 2.682$ ,  $p$ -value  $< 0.00731$ ).

302 On some branches of the *D. innubila* trio phylogeny, we find differing signatures from the  
 303 total *D. innubila* trio phylogeny. Specifically, while Gram-positive bacterial response is fast

304 evolving in *D. falleni*, antifungal and Gram-negative bacterial responses are fast evolving in *D.*  
305 *innubila* (Supplementary Table 5, *t*-test  $t = 2.11$ ,  $p$ -value  $< 0.05$ ), whereas none of these three  
306 groups are fast evolving in *D. phalerata*. This potentially highlights differences in the pathogens  
307 and environments encountered by the three species. Interestingly, Toll signaling, but not Gram-  
308 positive defense response, is fast evolving in *D. innubila*, (Figure 3, Supplementary Table 5),  
309 suggesting Toll may play a separate role from signaling Gram-positive defense response in *D.*  
310 *innubila*, possibly directed more acutely towards antiviral or antifungal defense (Takeda and Akira  
311 2005; Zambon et al. 2005; Palmer et al. 2018c) or directed towards Toll's role in the regulation of  
312 development (Keshishian et al. 1993; Valanne et al. 2011).

313

314 *Several alternative antiviral immune genes are rapidly evolving in both species*

315 We separated the known antiviral pathways and viral interacting genes into specific  
316 categories, and examined their evolution in both *D. melanogaster*, *D. innubila* and across each  
317 clade to find pathways showing consistent rates of evolution. The JAK-STAT pathway (Janus  
318 kinase signal transduction and activation of transcription) is a conserved signaling pathway  
319 involved in processes such as immunity, cell death and general stress response, and is implicated  
320 in the DNA virus response (Hultmark 2003; West and Silverman 2018). We find this pathway is  
321 significantly faster evolving compared to the background across the *D. innubila* trio, while NF-  
322  $\kappa$ B, Toll and putative viral-capsid interacting genes are evolving significantly faster than  
323 background genes of similar *dS* in both *D. innubila* and *D. melanogaster* trios (Supplementary  
324 Figure 3, *t*-test  $t = 2.90$ ,  $p$ -value  $< 0.05$ ). Several genes within these categories also showed  
325 consistent signatures across the *D. innubila* and *D. melanogaster* trios (Figure 2 & 3,  
326 Supplementary Table 4 & 5). Genes rapidly evolving in both lineages include the JAK-STAT  
327 cytokines *upd2* and *upd3*, JAK-STAT regulatory genes *CG30423* and *asrij*, the Toll pathway genes  
328 *grass* and *GNBP1*, and the NF- $\kappa$ B signaling molecules *relish* and *Aos1*. After controlling for  
329 multiple nucleotide substitutions per site with  $\delta$  (Pond et al. 2005; Venkat et al. 2018), we found  
330 that JAK-STAT, NF-  $\kappa$ B, Toll and viral capsid associated genes are rapidly evolving in both trios  
331 (Supplementary Figure 2, GLM  $t > 3.22$ ,  $p$ -value  $> 0.00128$ ), however the putatively viral capsid  
332 associated genes are evolving most rapidly in the *innubila* trio (Supplementary Figure 2, GLM  $t =$   
333  $4.124$ ,  $p$ -value  $= 3.73 \times 10^{-05}$ ).

334

335 *Low antiviral RNAi expression in Drosophila innubila*

336 We examined immunity and RNAi genes in the context of baseline (e.g. constitutive) gene  
337 expression in *D. innubila* compared to *D. melanogaster* using ModEncode (Consortium et al.  
338 2011). It should be noted that this is not a well-controlled comparison, whereby differences in  
339 expression could be due to different laboratory conditions or other experimental variables as  
340 opposed to true baseline expression differences. Nevertheless, some of the observed differences  
341 are consistent with rates of molecular evolution. We found no effect for life stage, sex or tissue on  
342 immune expression outside of an increase in immune expression when transitioning from embryo  
343 to larval stages (GLM  $p > 0.05$ , Supplementary Tables 12-19). Specifically, the Toll pathway genes  
344 *Toll*, *GNBPI* and *grass* had higher expression in larvae than embryos, and this was maintained  
345 throughout the rest of the life stages. Because the main shift in gene expression appears to occur  
346 as embryos develop into larvae, we focused on adults, as they represent a more stable period of  
347 gene expression. We focused on adult whole-body expression differences between *D. innubila* and  
348 *D. melanogaster*. The viral RNAi pathway is mostly shut off in *D. innubila* (Figure 3B, only 2 of  
349 7 genes showed expression greater than 1 read per million counts per kbp of gene in larvae and  
350 adults) and had significantly lower expression than the rest of the genome across all life stages  
351 (both before and after adjusting for gene length, Wilcoxon rank sum  $p$ -value  $< 0.02$ ). In contrast,  
352 the piRNA pathway showed appreciable levels of expression and no difference from the  
353 background genome at any stage (Figure 3B, Wilcoxon rank sum  $p$ -value  $> 0.05$ ). This difference  
354 in expression between the antiviral RNAi and piRNA pathways may be due to antiviral genes only  
355 being expressed upon infection, though other antiviral genes show no significant difference in  
356 expression from the background (Wilcoxon Rank Sum test:  $W = 27464$ ,  $p$ -value = 0.1089).  
357 Additionally, AMPs, which are highly induced upon infection in insects, here also showed high  
358 levels of constitutive expression compared to the background (Figure 3B, Wilcoxon Rank Sum  
359 test:  $W = 11642$ ,  $p$ -value  $< 0.05$ ). Furthermore, the antiviral RNAi genes are significantly more  
360 highly expressed compared to background genes in the *D. melanogaster* expression data, even  
361 without a known infection, and are further induced upon infection with a DNA virus (Wilcoxon  
362 Rank Sum test:  $W = 80672$ ,  $p$ -value  $< 0.005$ ) (Obbard et al. 2006; Obbard et al. 2009; Ding 2010;  
363 Palmer et al. 2018a; Palmer et al. 2018c). Antiviral RNAi genes are significantly more highly  
364 expressed in *D. melanogaster* than in *D. innubila* (Wilcoxon Rank Sum test:  $W = 2$ ,  $p$ -value =  
365 0.0003), while immune signaling and immune recognition genes are more highly expressed in *D.*



366 *innubila* compared to *D. melanogaster* (Wilcoxon Rank Sum test:  $W = 178$   $p$ -value = 0.0002).  
367 Thus, high rates of expression seem to be associated with high rates of evolution in *Drosophila*  
368 immune genes, irrespective of species.

369

## 370 **Discussion**

371 Host/parasite coevolution is ubiquitous across the tree of life (Dawkins and Krebs 1979; Lively  
372 1996). It is expected to result in rapid evolution of protein sequence in both the host and the  
373 parasite, as both organisms are adapting to escape the selective pressure exerted by the other. In  
374 support of this, immune genes in *Drosophila*, and other organisms, evolve more rapidly than most  
375 other gene categories (Kimbrell and Beutler 2001; Sackton et al. 2007; Obbard et al. 2009; Enard  
376 et al. 2016), the fastest among these being the antiviral genes (Obbard et al. 2006; Obbard et al.  
377 2009; Enard et al. 2016; Palmer et al. 2018a). Here, we have shown that while immune genes are  
378 fast evolving in *D. innubila*, the categories of genes most rapidly evolving is strikingly different  
379 from those most rapidly evolving in *D. melanogaster*.

380         There are several explanations for the observed differences in immune evolution between  
381 the *D. melanogaster* and *D. innubila* trios. First, and most obvious explanation is that different  
382 pathogen pressures result in different rates of evolution between species. The most tempting  
383 difference to highlight is the high frequency DNA virus infection in *D. innubila* but not *D.*  
384 *melanogaster* (Unckless 2011). DNA virus response in *Drosophila* involves a larger set of  
385 pathways than RNA virus response, which is largely mediated via the siRNA pathway (Coccia et  
386 al. 2004; Bronkhorst et al. 2012; Palmer et al. 2018b). Many previous studies of RNA and DNA  
387 virus immune response in *D. melanogaster* have implicated the IMD, JAK-STAT, NF- $\kappa$ B and Toll  
388 pathways as vital components of viral defense, all of which are rapidly evolving in *D. innubila*  
389 (Dostert et al. 2005; Zambon et al. 2005; Hetru and Hoffmann 2009; William H Palmer et al. 2018;  
390 West and Silverman 2018). Due to overlapping viral transcripts, infection can still induce the  
391 siRNA pathway irrespective of the viral class, but may differ in effectiveness between species and  
392 viral class (Webster et al. 2015; Palmer et al. 2018c). It is currently believed that *D. melanogaster*  
393 is mostly exposed to RNA viruses in nature whereas *D. innubila* is mostly exposed to DNA viruses  
394 (Unckless 2011; Webster et al. 2015; Lewis et al. 2018). Therefore, it makes sense that various  
395 immune response pathways are evolving at different rates in the two species groups. In keeping

396 with this, *D. falleni* and *D. phalerata* have different rates of immune gene evolution and are not  
397 frequently exposed to the DNA virus (Unckless 2011) (Supplementary Tables 5 and 6).

398 DNA virus exposure is not the only difference in pathogens seen between *D. innubila* and  
399 *D. melanogaster*. In fact, most pathways identified as rapidly evolving in *D. innubila* are involved  
400 in the response to infection by multiple pathogens (Toll, for viruses, Fungi and Gram-positive  
401 bacteria) or are general stress response pathways (JAK-STAT). Given the similar ecologies  
402 (including regular exposure to rotting mushrooms) (Jaenike et al. 2003; Perlman et al. 2003) and  
403 consistent signatures of rapid evolution in *D. innubila* and *D. falleni*, similar pathogen pressures  
404 may drive rapid evolution of these pathways in quinia group flies (Shoemaker et al. 1999;  
405 Perlman et al. 2003). For example, the rapid evolution of Toll signaling but not Gram-positive  
406 defense response (Figure 3), might suggest that Toll is evolving in response to something other  
407 than Gram-positive bacteria such as fungal pathogens, viruses or even extracellular parasites that  
408 uniquely infect the quinia group (Jaenike and Perlman 2002; Hoffmann 2003; Perlman et al.  
409 2003; Zambon et al. 2005; Hamilton et al. 2014; Palmer et al. 2018b).

410 Previous work in *D. melanogaster* has highlighted the role that Gram-negative commensal  
411 bacteria play in priming the antiviral immune system (Sansone et al. 2015). As both the Toll and  
412 IMD signaling pathways are rapidly evolving across the *innubila* trio, it is conceivable that this  
413 priming may play a role in immune defense in *D. innubila*.

414 Finally, Toll signaling is also involved in dorso/ventral development and motorneuron  
415 development in *Drosophila* (Keshishian et al. 1993; Hoffmann 2003; Valanne et al. 2011), as eye  
416 and neuronal development are almost always enriched in *D. innubila* but not *D. melanogaster*  
417 (Supplementary Table 4), this rapid evolution of Toll may have little to do with immune response  
418 and instead is involved in changes in the body pattern to adapt to changes in the environment of  
419 *D. innubila*. Though this explanation does not explain the rapid evolution of other immune  
420 pathways.

421 A second hypothesis for the lack of evolution in the antiviral RNAi system, is that the  
422 immune response to DNA virus infection has diverged in the approximately 50 million years since  
423 the quinia and melanogaster groups last shared a common ancestor. They may fundamentally  
424 differ in their immune response to viral infection, and this may be due to the divergence of the  
425 siRNA pathways across the *Drosophila* groups (Lewis et al. 2018). This divergence could also be  
426 non-adaptive, in fact, given *D. innubila* has undergone repeated bottlenecks during habitat

427 invasion, it is possible that changes in effective population size may have led to genetic drift  
428 steering the evolution of the immune system in this species, resulting in relaxed constraint on  
429 immunity genes. An ineffective antiviral immune system may even explain the high frequency of  
430 DiNV infection in *D. innubila* (Unckless 2011). However, rates of evolution are mostly consistent  
431 across the *D. innubila* trio, and, as broadly dispersed temperate species, *D. phalerata* and *falleni*  
432 should not have been affected by the same demographic patterns (Markow and O’Grady 2006). *D.*  
433 *innubila*’s invasion of the ‘sky islands’ is also estimated to be more ancient than *D. melanogaster*’s  
434 global invasion (occurring during the last glaciation period, 10-100KYA), with current estimates  
435 of diversity at similar levels as *D. melanogaster* (Dyer and Jaenike 2005). If *D. innubila*’s  
436 bottleneck was more severe than *D. melanogaster*’s, drift may still explain the lack of antiviral  
437 evolution in *D. innubila*. The lack of adaptation of the antiviral RNAi could also be due to the  
438 more recent infection by DiNV, estimated to have infected *D. innubila* 10-30 thousand years ago,  
439 however this is more than enough time for adaptation to occur in *Drosophila* (Aminetzach et al.  
440 2005; Karasov et al. 2010).

441 There are several other aspects of the host biology that may explain the constrained  
442 evolution of the siRNA in *D. innubila* (Figure 2, 3). siRNA, alongside piRNA have been  
443 implicated in transposon regulation as well as viral suppression (Biryukova and Ye 2015). It is  
444 possible siRNA has an alternate, TE related role in *D. innubila*, which may contribute to their low  
445 TE content (Figure 1, Supplementary Figure 6).

446 Studies have also identified an interaction between *Wolbachia* infection and resistance or  
447 susceptibility to viral infection (Teixeira et al. 2008; Martinez et al. 2014). The high frequency of  
448 *Wolbachia* infection in *D. innubila* (Dyer and Jaenike 2005), may therefore provide some  
449 resistance to viral infection or may be involved in immune system priming (Sansone et al. 2015).  
450 However, *Wolbachia* has only been shown to protect against RNA viruses (Teixeira et al. 2008),  
451 and this effect of *Wolbachia* was found to be absent in an earlier assessment of DiNV infections  
452 in *D. innubila* (Unckless 2011; Martinez et al. 2014), suggesting *Wolbachia* may not play a role in  
453 viral resistance.

454 We have worked to bring mycophagous *Drosophila* to the table as a modern genomic  
455 model for the study of immune system evolution. Here we have highlighted that the evolution of  
456 the immune system among closely related trios of species may differ drastically across *Drosophila*  
457 genera. Specifically, we found that across the *D. innubila* genome, even though the immune system

458 is, in general, evolving rapidly; the canonical antiviral RNAi pathways do not appear to be  
459 evolving as if in an arms race with viruses. Instead, several alternative immune pathways may be  
460 evolving in response to the different pathogen pressures seen in this species. Together these results  
461 suggest that the evolution of genes involved in the immune system can be quite specific to the suite  
462 of pathogens faced by hosts.

463

## 464 **Methods**

### 465 *DNA/RNA isolation, library preparation, genome sequencing and assembly*

466 We extracted DNA following the protocol described in (Chakraborty et al. 2017) for *D.*  
467 *innubila*, *D. falleni* and *D. phalerata* as further described in the supplementary materials. We  
468 prepared the *D. innubila* DNA as a sequencing library using the Oxford Nanopore Technologies  
469 Rapid 48-hour (SQK-RAD002) protocol, which was then sequenced using a MinION (Oxford  
470 Nanopore Technologies, Oxford, UK; NCBI SRA: SAMN11037163) (Jain et al. 2016). The same  
471 DNA was also used to construct a fragment library with insert sizes of ~180bp, ~3000bp and  
472 ~7000bp, we sequenced this library on a MiSeq (300bp paired-end, Illumina, San Diego, CA,  
473 USA; NCBI SRA: SAMN11037164). We prepared the *D. falleni* and *D. phalerata* samples as  
474 Illumina libraries like *D. innubila* but with a 300bp insert size. We sequenced the *D. falleni*  
475 fragment library on one half of a MiSeq (300bp paired-end, Illumina, San Diego, CA, USA; NCBI  
476 SRA: SAMN11037165) by the KU CMADP Genome Sequencing Core. We sequenced the *D.*  
477 *phalerata* fragment library on a fraction of an Illumina HiSeq 4000 run (150bp paired end,  
478 Illumina, San Diego, CA; NCBI SRA: SAMN11037166).

479 For gene expression analyses, we obtained two replicate samples of female and male heads  
480 and whole bodies (including heads), embryos, larvae (pooled across all three instar stages) and  
481 pupae (all non-adults were unsexed). RNA was extracted using a standard Trizol procedure  
482 (Simms et al. 1993) with a DNase step. RNA-sequencing libraries were constructed using the  
483 standard TruSeq protocol (McCoy et al. 2014) with ½ volume reactions to conserve reagents.  
484 Individually indexed RNA libraries (2 replicates from each tissue/sex) were sequenced on one lane  
485 of an Illumina “Rapid” run with 100bp single-end reads (NCBI SRA: SAMN11037167-78). All  
486 data used in the assembly and annotation of the *D. innubila* genome are available in the NCBI  
487 BioProject PRJNA524688.

488 Bases were called *post hoc* using the built in read\_fast5\_basecaller.exe program with  
489 options: -f FLO-MIN106 -k SQK-RAD002 -r-t 4. Raw reads were assembled using CANU  
490 version 1.6 (Koren et al. 2016) with an estimated genome size of 150 million bases and the  
491 “nanopore-raw” flag. We then used Pilon to polish the genome with our Illumina fragment library  
492 (Walker et al. 2014). The resulting assembly was submitted to PhaseGenomics (Seattle, WA, USA)  
493 for scaffolding using Hi-C and further polished with Pilon for seven iterations. With each iteration,  
494 we evaluated the quality of the genome and the extent of improvement in quality, by calculating  
495 the N50 and using BUSCO to identify the presence of conserved genes in the genome, from a  
496 database of 2799 single copy Dipteran genes (Simão et al. 2015).

497 Repetitive regions were identified *de novo* using RepeatModeler (engine = NCBI) (Smit  
498 and Hubley 2008) and RepeatMasker (-gff -gcalc -s) (Smit and Hubley 2015).

499 These sequencing and assembly steps are further described in the supplementary methods,  
500 alongside additional steps taken to verify genes, identify additional contigs and genes, and find  
501 genes retained across all species. The final version of the genome and annotation is available on  
502 the NCBI (accession: SKCT000000000).

503

#### 504 *Genome annotation*

505 As further described in the supplementary methods, we assembled the transcriptome, using all  
506 Illumina RNA reads following quality filtering, using Trinity (version 2.4.0) (Haas et al. 2013),  
507 Oases (velvetg parameters: -exp\_cov 100 -max\_coverage 500 -min\_contig\_lgth 50 -read\_trkg  
508 yes) (Schulz et al. 2012), and SOAPdenovo Trans (127mer with parameters: SOAPdenovo-Trans-  
509 127mer -p 28 -e 4 and the following kmers: 95, 85, 75, 65, 55, 45, 35, 29, 25, 21) (Xie et al. 2014)  
510 which we combined using EvidentialGene (Gilbert 2013; <http://eugenes.org/EvidentialGene/>). We  
511 used the *D. innubila* transcriptome as well as protein databases from *M. domestica*, *D.*  
512 *melanogaster*, and *D. virilis*, in MAKER2 (Holt and Yandell 2011) to annotate the *D. innubila*  
513 genome, including using *RepeatModeler* (Smit and Hubley 2008) to not mis-assign repetitive  
514 regions. This was repeated for three iterations to generate a GFF file containing gene evidence  
515 generated by MAKER2 (Holt and Yandell 2011) (NCBI: ).

516

#### 517 *Drosophila quinaria* group species on the *Drosophila* phylogeny

518 To build a phylogeny for the *Drosophila* species including *D. innubila*, *D. falleni* and *D.*  
519 *phalerata*, we identified genes conserved across all *Drosophila* and humans and found in the  
520 Dipteran BUSCO gene set (Simão et al. 2015). We then randomly sampled 100 of these genes,  
521 extracted their coding sequence from our three focal species and 9 of the 12 *Drosophila* genomes  
522 (Limited to nine due to our focus on the *Drosophila* subgenus and the close relation of several  
523 species, rendering them redundant in this instance, Clark et al. 2007). We also searched for  
524 genomes in the *Drosophila* subgenus with easily identifiable copies of these 100 conserved genes,  
525 settling on *D. busckii* (Zhou and Bachtrog 2015), *D. neotestacea* (Hamilton et al. 2014), *D.*  
526 *immigrans* and *Scaptodrosophila lebanonensis* (Zhou et al. 2012). We aligned these genes using  
527 MAFFT (--auto) (Katoh et al. 2002), concatenated all alignments and generated a phylogeny using  
528 PhyML with 500 bootstraps (-M GTR, -Gamma 8, -B 500) (Guindon et al. 2010).

529

### 530 *Signatures of adaptive molecular evolution among species*

531 We mapped short read sequencing data of *D. innubila*, *D. falleni* and *D. phalerata* to the repeat-  
532 masked *D. innubila* reference genome using BWA MEM (Li and Durbin 2009). As similar  
533 proportions of reads mapped to the genome (97.6% for *D. innubila*, 96.1% for *D. falleni* and 94.3%  
534 for *D. phalerata*), covering a similar proportion of the reference genome (99.1% for *D. innubila*,  
535 98.5% for *D. falleni* and 97.1% for *D. phalerata*), we considered the *D. innubila* genome to be of  
536 similar enough to these species to reliably call single nucleotide polymorphisms and indels. We  
537 realigned around indels using GATK IndelRealigner then called variants using HaplotypeCaller  
538 (default parameters) (McKenna et al. 2010; DePristo et al. 2011). We then used GATK  
539 FastaReferenceMaker (default parameters) to generate an alternate, reference genome for each of  
540 these species (McKenna et al. 2010; DePristo et al. 2011). We extracted the coding sequence for  
541 each gene found in the genomes of *D. innubila*, *D. phalerata* and *D. falleni* and aligned orthologs  
542 using PRANK (-codon +F -f=paml) (Löytynoja 2014). For each PRANK generated gene  
543 alignment and gene tree, we used codeML (Yang 2007) for the branches model (M0 model), to  
544 identify genes with signatures of rapid evolution on the *D. innubila*, *D. falleni*, *D. phalerata*  
545 branches, as well as across the entire clade. Focusing specifically in the *D. innubila* branch, for  
546 genes involved in the immune system pathways, we attempted to rescale for synonymous  
547 divergence. For each focal gene, we found genes with *dS* within 0.01 of the focal gene on the same

548 scaffold. We then found the difference in  $dN/dS$  between the focal gene and the median of the  
549 control gene group.

550 For an independent contrast, we downloaded the latest coding sequences for *D.*  
551 *melanogaster*, *D. simulans* and *D. yakuba* from Flybase.org (Downloaded January 2018, Gramates  
552 et al. 2017) and aligned orthologous genes using PRANK (-codon +F -f=paml) (Löytynoja 2014).  
553 Following the generation of a gene alignment and gene tree, we used codeML (Yang 2007) to  
554 identify genes with adaptive molecular signatures on each branch of the phylogeny (using the  
555 branch based model, M0). Again, we found the difference in  $dN/dS$  from background genes of  
556 similar  $dS$  (with 0.01) on the same scaffold for all immune genes, focusing on the *D. melanogaster*  
557 branch. We compared genes enriched in the top 2.5% for  $dN/dS$  (versus the lower 97.5%) using  
558 GOrilla (Eden et al. 2009) in both *D. innubila* and *D. melanogaster*. We also performed this  
559 analysis using the top 5% and 10% and found no differences in enrichments than the more stringent  
560 2.5% (not shown).

561 We downloaded genes involved in a core set of gene ontologies from GOslim (Consortium  
562 et al. 2000; Carbon et al. 2017) and found the mean and standard error of  $dN/dS$  for each category  
563 in both *D. melanogaster* and *D. innubila*. We chose to compare genes in the top 10% for  $dN/dS$  in  
564 both species in these categories, as no enrichments are found in the top 2.5% or 5% for the GOslim  
565 genes alone, instead we chose to broadly examine the fastest evolving genes in each species, even  
566 if not significantly enriched.

567 Finally, to control for possibly multiple nucleotide substitutions in a single site creating  
568 false signals of rapid evolution (Venkat et al. 2018), we calculated  $\delta$  using HyPhy (Pond et al.  
569 2005) based on the method presented in (Venkat et al. 2018).  $\delta$  was calculated under both the null  
570 and alternative models, with the best model selected based on the result of a  $\chi^2$  test. We then  
571 compared  $\delta$  between each species and across immune gene categories.

572

### 573 *RNA differential expression analysis*

574 We used GSNAP (-sam -N 1) (Wu and Nacu 2010) to map each set of *D. innubila* RNA  
575 sequencing short reads to the repeat masked *D. innubila* genome with the TE sequences  
576 concatenated at the end (NCBI SRA: SAMN11037167-78). We then counted the number of reads  
577 mapped to each gene per kb of exon using HTSeq (Anders et al. 2015) for all mapped RNA  
578 sequencing data and normalized by counts per million per dataset. Mapped RNA sequencing

579 information for *D. melanogaster* across all life stages was downloaded from ModEncode  
580 (modencode.org) (Chen et al. 2014). We compared *D. melanogaster* data to *D. innubila* data using  
581 EdgeR (Robinson et al. 2009) to identify differentially expressed genes, and also compared  
582 RNAseq reads per million reads per 1kbp of exon (fragments per kilobase of exon per million  
583 reads, FPKM) between the immune genes of *D. innubila* and *D. melanogaster*.

584

#### 585 *Statistical analysis*

586 All statistical analyses were performed using R (R Core Team 2013). We used the R packages  
587 EdgeR (Robinson et al. 2009), RCircos (Zhang et al. 2013) and ggplot2 (Wickham 2009) for  
588 statistical analysis and plot generation/visualization.

589

#### 590 **Acknowledgements**

591 We are thankful to Justin Blumenstiel, Jamie Walters, John Kelly, Carolyn Wessinger, Joanne  
592 Chapman and three anonymous reviewers for helpful discussion and advice concerning the  
593 manuscript. We thank Brittny Smith and the KU CMADP Genome Sequencing Core (NIH Grant  
594 P20 GM103638) for assistance in genome isolation, library preparation and sequencing. Genome  
595 annotation was performed in the K-INBRE Bioinformatics Core supported by P20 GM103418.  
596 This work was supported by a postdoctoral fellowship from the Max Kade foundation (Austria)  
597 and a K-INBRE postdoctoral grant to TH (NIH Grant P20 GM103418). This work was also funded  
598 by NIH Grants R00 GM114714 and R01 AI139154 to RLU.

599

600



601 **Supplementary Tables and Figures**

602 **Supplementary Table 1:** Summary of reads used for genome sequencing, assembly, annotation  
603 and *dN/dS* calculation.

604 **Supplementary Table 2:** Summary statistics for each iteration of the genome.

605 **Supplementary Table 3:** Summary of the genic characteristics of the *D. innubila* genome.

606 **Supplementary Table 4:** Genes ontologies (GO) enriched for genes with high/low residuals for  
607 *dN/dS* between *D. melanogaster* and *D. innubila*, due to drastic differences between the species.  
608 Enriched categories are categories which are slow evolving in one species, but fast evolving in the  
609 other.

610 **Supplementary Table 5:** Summary of *dN/dS* statistics for each immune gene category across the  
611 total group and on each branch. Additionally, the t-score and p-value for a two-sided *t*-test ( $\mu = 0$ )  
612 for that category is shown. Significant categories are highlighted in bold.

613 **Supplementary Table 6:** *dN/dS* enrichment for *Drosophila innubila* trio for processes,  
614 components and functions, including any enrichments for specific branches.

615 **Supplementary Table 7:** GO enrichment for processes, components and functions for differential  
616 expression between *D. innubila* males and females.

617 **Supplementary Table 8:** GO enrichment for processes, components and functions for differential  
618 expression between *D. innubila* embryos and larvae.

619 **Supplementary Table 9:** GO enrichment for processes, components and functions for differential  
620 expression between *D. innubila* larvae and pupae.

621 **Supplementary Table 10:** GO enrichment for processes, components and functions for  
622 differential expression between *D. innubila* pupae and adults.

623 **Supplementary Table 11:** *dN/dS* GO enrichment for duplications for processes, components and  
624 functions, including any enrichments for specific branches.

625 **Supplementary Table 12:** A table summarizing the differential gene expression shown in  
626 Supplementary Tables 13-19, showing the number of genes differentially expressed between *D.*  
627 *innubila* and *D. melanogaster* at differing life stages, with enrichments in gene ontology (GO)  
628 categories.

629 **Supplementary Table 13:** GO enrichment for processes, components and functions for  
630 differential expression between *D. melanogaster* and *D. innubila* embryos.

631 **Supplementary Table 14:** GO enrichment for processes, components and functions for  
632 differential expression between *D. melanogaster* and *D. innubila* larvae.

633 **Supplementary Table 15:** GO enrichment for processes, components and functions for  
634 differential expression between *D. melanogaster* and *D. innubila* pupae.

635 **Supplementary Table 16:** GO enrichment for processes, components and functions for  
636 differential expression between *D. melanogaster* and *D. innubila* adults.

637 **Supplementary Table 17:** GO enrichment for processes, components and functions for  
638 differential expression between *D. melanogaster* and *D. innubila* adult males.

639 **Supplementary Table 18:** GO enrichment for processes, components and functions for  
640 differential expression between *D. melanogaster* and *D. innubila* adult females.

641 **Supplementary Table 19:** GO enrichment for processes, components and functions for  
642 differential expression between *D. melanogaster* and *D. innubila* total samples.

643 **Supplementary Table 20:** Enrichment or depletion of genes differentially expressed between  
644 male and female samples on each scaffold/Muller element.

645

646 **Supplementary Figure 1:** Histograms of dN/dS for *D. innubila* and *D. melanogaster*.

647 **Supplementary Figure 2:**  $\delta$  (calculated using HyPhy) by immunity category for both *D.*  
648 *innubila* and *D. melanogaster*.

649 **Supplementary Figure 3:** Difference between viral RNAi, JAK-STAT (filled dots = regulatory,  
650 empty dots = cytokines), NF- $\kappa$ B, Toll and putatively viral-interacting proteins from the  
651 background dN/dS of genes of similar dS (+0.01dS) for the *D. melanogaster* branch, the *D.*  
652 *innubila* branch, the total *D. melanogaster* tree and the total *D. innubila* tree. Genes known to be  
653 associated with the immune response to viral infection, but no known pathway are classed as  
654 'Other Antiviral'. A *p*-value (from a two-sided *t*-test looking for significant differences from 0)  
655 of 0.05 or lower is designated with \*.

656 **Supplementary Figure 4:** Codon bias distributions across the *Drosophila innubila* genome,  
657 separated by scaffold. CAI = Codon adaptation index. CBI = Codon bias index. Fop = Frequency  
658 of optimal codons. GC = Proportion of GC across each gene.

659 **Supplementary Figure 5:** Comparison between orphan genes and previously described genes,  
660 including: **A.** Codon adaptation index (CAI). **B.** Codon bias index (CBI). **C.** Frequency of

661 optimal codons (Fop). **D.** Gene length (in bp). **E.** Number of introns per gene. **F.** Mean  
662 expression across life stages (read counts per million).

663 **Supplementary Figure 6:** **A.** The proportion of the *D. innubila* genome masked by each type of  
664 repeat. LINE = Long interspersed nuclear element RNA transposon, LTR = long terminal repeat  
665 RNA transposon, RC = rolling circle DNA transposon, TIR = terminal inverted repeat DNA  
666 transposon. **B.** TE content of *D. innubila*, *falleni* and *phalerata*, **C.** Copy number comparisons  
667 between *D. innubila*, *D. falleni* and *phalerata*. **D.** dnaPipeTE estimates of the genomic  
668 proportion of repetitive elements for each species examined here. Other, NA and SINE  
669 categories were removed due to small proportions. Though unlabeled, rRNA is shown in yellow  
670 and constitutes 1-2% of the genome.

671 **Supplementary Figure 7:** Number of TE families found in *D. innubila*, closely related to known  
672 TE families (taken from Repbase) in different species group, identified using BLAST, suggesting  
673 relatively recent horizontal transfer events.

674 **Supplementary Figure 8:**  $dN/dS$  versus  $dS$  across paralogs for recently duplicated genes. Metal  
675 ion binding, protein metabolism and immunity genes are highlighted.

676 **Supplementary Figure 9:** Volcano plots showing differential gene expression between *D.*  
677 *innubila* and *D. melanogaster* at different life stages. Dots are colored by their significance and if  
678 a recent duplication or not (duplicates layered on top), the significance cut off is set a 0.05  
679 following multiple testing correction.

680 **Supplementary Figure 10:** Volcano plot showing differential gene expression between *D.*  
681 *innubila* male and female samples and significant differences, highlighting if genes are  
682 duplicated relative to *D. virilis* or not, and if genes are involved in sperm motility.

683 **Supplementary Figure 11:** Inversions identified between *D. innubila* and *D. falleni*, and  
684 between *D. innubila/falleni* and *D. phalerata* using Pindel (Ye et al. 2009) and Manta (Chen et  
685 al. 2016) (taking the consensus of the two programs). Scaffolds are labelled and colored by the  
686 Muller element they belong to.

687 **Supplementary Figure 12:** Size and number of each structural variant between *D. innubila* and  
688 *D. falleni* identified using Pindel and Manta (taking the consensus of the two programs).

689  
690  
691

692 **References**

693

694 Aminetzach YT, Macpherson JM, Petrov D. 2005. Pesticide Resistance via Transposition-  
695 Mediated Adaptive Gene Truncation in *Drosophila*. *Science* (80-. ). 309:764–767.

696 Anders S, Pyl PT, Huber W. 2015. HTSeq-A Python framework to work with high-throughput  
697 sequencing data. *Bioinformatics* 31:166–169.

698 Barbier V. 2013. Pastrel, a restriction factor fo picornalike-viruses in *Drosophila melanogaster*.

699 Biryukova I, Ye T. 2015. Endogenous siRNAs and piRNAs derived from transposable elements  
700 and genes in the malaria vector mosquito *Anopheles gambiae*. *BMC Genomics* 16:1–17.

701 Bronkhorst AW, Cleef KWR Van, Vodovar N, İnce İA, Blanc H, Vlák JM, Saleh M-C, Rij RP  
702 Van. 2012. The DNA virus Invertebrate iridescent virus 6 is a target of the *Drosophila*  
703 RNAi machinery. *Proc. Natl. Acad. Sci.* 109:E3604–E3613.

704 Carbon S, Dietze H, Lewis SE, Mungall CJ, Munoz-Torres MC, Basu S, Chisholm RL, Dodson  
705 RJ, Fey P, Thomas PD, et al. 2017. Expansion of the gene ontology knowledgebase and  
706 resources: The gene ontology consortium. *Nucleic Acids Res.* 45:D331–D338.

707 Chakraborty M, Zhao R, Zhang X, Kalsow S, Emerson JJ. 2017. Extensive hidden genetic  
708 variation shapes the structure of functional elements in *Drosophila*. *Doi.Org* 50:114967.

709 Chen X, Schulz-Trieglaff O, Shaw R, Barnes B, Schlesinger F, Källberg M, Cox AJ, Kruglyak S,  
710 Saunders CT. 2016. Manta: Rapid detection of structural variants and indels for germline  
711 and cancer sequencing applications. *Bioinformatics* 32:1220–1222.

712 Chen Z, Sturgill D, Qu J, Jiang H. 2014. Comparative validation of the *D. melanogaster*  
713 modENCODE transcriptome annotation. *Genome.* :1209–1223.

714 Clark AG, Eisen MB, Smith DR, Bergman CM, Oliver B, Markow T a, Kaufman TC, Kellis M,  
715 Gelbart W, Iyer VN, et al. 2007. Evolution of genes and genomes on the *Drosophila*  
716 phylogeny. *Nature* 450:203–218.

717 Coccia EM, Severa M, Giacomini E, Monneron D, Remoli ME, Julkunen I, Cella M, Lande R,  
718 Uzé G. 2004. Viral infection and Toll-like receptor agonists induce a differential expression  
719 of type I and lambda interferons in human plasmacytoid and monocyte-derived dendritic  
720 cells. *Eur. J. Immunol.* 34:796–805.

721 Consortium T, Roy S, Ernst J, Kharchenko P V, Kheradpour P, Negre N, Eaton ML, Landolin  
722 JM, Bristow C a, Ma L, et al. 2011. Identification of Functional Elements and Regulatory

- 723 Circuits by *Drosophila* modENCODE. *Science* (80-. ). 330:1787–1797.
- 724 Consortium TGO, Ashburner M, Ball C, Blake J, Botstein D, Butler H, Cherry M, Davis A,  
725 Dolinski K, Dwight S, et al. 2000. Gene ontology: Tool for the unification of biology. *Nat.*  
726 *Genet.* 25:25–29.
- 727 Darling ACE, Mau B, Blattner FR, Perna NT. 2004. Mauve : Multiple Alignment of Conserved  
728 Genomic Sequence With Rearrangements. 1394–1403.
- 729 Daugherty MD, Malik HS. 2012. Rules of engagement: molecular insights from host-virus arms  
730 races. *Annu. Rev. Genet.* 46:677–700.
- 731 Dawkins R, Krebs JR. 1979. Arms Races between and within Species. *Proc. R. Soc. London B*  
732 *Biol. Sci.* 205:489–511.
- 733 DePristo MA, Banks E, Poplin R, Garimella K V, Maguire JR, Hartl C, Philippakis AA, del  
734 Angel G, Rivas MA, Hanna M, et al. 2011. A framework for variation discovery and  
735 genotyping using next-generation DNA sequencing data. *Nat. Genet.* 43:491–498.
- 736 Ding SW. 2010. RNA-based antiviral immunity. *Nat. Rev. Immunol.* 10:632–644.
- 737 Dostert C, Jouanguy E, Irving P, Troxler L, Galiana-Arnoux D, Hetru C, Hoffmann JA, Imler J-  
738 L. 2005. The Jak-STAT signaling pathway is required but not sufficient for the antiviral  
739 response of *Drosophila*. *Nat Immunol* 6:946–953.
- 740 Dyer K a., Jaenike J. 2005. Evolutionary dynamics of a spatially structured host-parasite  
741 association: *Drosophila innubila* and male-killing *Wolbachia*. *Evolution* 59:1518–1528.
- 742 Dyer KA. 2004. Evolutionarily Stable Infection by a Male-Killing Endosymbiont in *Drosophila*  
743 *innubila*: Molecular Evidence From the Host and Parasite Genomes. *Genetics* 168:1443–  
744 1455.
- 745 Dyer KA, Minhas MS, Jaenike J. 2005. Expression and modulation of embryonic male-killing in  
746 *Drosophila innubila*: opportunities for multilevel selection. *Evolution* 59:838–848.
- 747 Eden E, Navon R, Steinfeld I, Lipson D, Yakhini Z. 2009. GOrilla: A tool for discovery and  
748 visualization of enriched GO terms in ranked gene lists. *BMC Bioinformatics* 10:1–7.
- 749 Ekengren S, Hultmark D. 2001. A family of Turandot-related genes in the humoral stress  
750 response of *Drosophila*. *Biochem. Biophys. Res. Commun.* 284:998–1003.
- 751 Enard D, Cai L, Gwennap C, Petrov DA. 2016. Viruses are a dominant driver of protein  
752 adaptation in mammals. *Elife* 5:1–25.
- 753 Gilbert D. 2013. EvidentialGene: mRNA Transcript Assembly Software. *EvidentialGene Evid.*

- 754 Dir. Gene Constr. Eukaryotes.
- 755 Goubert C, Modolo L, Vieira C, Moro CV, Mavingui P, Boulesteix M. 2015. De novo assembly  
756 and annotation of the Asian tiger mosquito (*Aedes albopictus*) repeatome with dnaPipeTE  
757 from raw genomic reads and comparative analysis with the yellow fever mosquito (*Aedes*  
758 *aegypti*). *Genome Biol. Evol.* 7:1192–1205.
- 759 Gramates LS, Marygold SJ, Dos Santos G, Urbano JM, Antonazzo G, Matthews BB, Rey AJ,  
760 Tabone CJ, Crosby MA, Emmert DB, et al. 2017. FlyBase at 25: Looking to the future.  
761 *Nucleic Acids Res.* 45:D663–D671.
- 762 Guindon S, Dufayard J-F, Lefort V, Anisimova M, Hordijk W, Gascuel O. 2010. New  
763 algorithms and methods to estimate maximum-likelihood phylogenies: assessing the  
764 performance of PhyML 3.0. *Syst. Biol.* 59:307–321.
- 765 Haas BJ, Papanicolaou A, Yassour M, Grabherr M, Blood PD, Bowden J, Couger MB, Eccles D,  
766 Li B, Lieber M, et al. 2013. De novo transcript sequence reconstruction from RNA-seq  
767 using the Trinity platform for reference generation and analysis. *Nat. Protoc.* 8:1494–1512.
- 768 Hamilton PT, Leong JS, Koop BF, Perlman SJ. 2014. Transcriptional responses in a *Drosophila*  
769 defensive symbiosis. *Mol. Ecol.* 23:1558–1570.
- 770 Hanson MA, Hamilton PT, Perlman SJ. 2016. Immune genes and divergent antimicrobial  
771 peptides in flies of the subgenus *Drosophila*. *BMC Evol. Biol.* 16:1–14.
- 772 Hetru C, Hoffmann JA. 2009. NF- $\kappa$ B in the Immune Response of *Drosophila*. *Cold Spring Harb.*  
773 *Perspect. Biol.* 1:a000232–a000232.
- 774 Hill T, Unckless RL. 2017. The dynamic evolution of *Drosophila innubila* Nudivirus. *Infect.*  
775 *Genet. Evol.*:1–25.
- 776 Hoffmann JA. 2003. The immune response of *Drosophila*. *Nature* 426:33–38.
- 777 Holt C, Yandell M. 2011. MAKER2 : an annotation pipeline and genome- database management  
778 tool for second- generation genome projects. *BMC Bioinformatics* 12:491.
- 779 Hultmark D. 2003. *Drosophila* immunity: Paths and patterns. *Curr. Opin. Immunol.* 15:12–19.
- 780 Hutvagner G, Simard MJ. 2008. Argonaute proteins: key players in RNA silencing. *Nat. Rev.*  
781 *Mol. Cell Biol.* 9:22–32.
- 782 Jaenike J, Dyer KA. 2008. No resistance to male-killing *Wolbachia* after thousands of years of  
783 infection. *J. Evol. Biol.* 21:1570–1577.
- 784 Jaenike J, Dyer KA, Reed LK. 2003. Within-population structure of competition and the

- 785 dynamics of male-killing *Wolbachia*. *Evol. Ecol. Res.* 5:1023–1036.
- 786 Jaenike J, Perlman SJ. 2002. Ecology and Evolution of Host-Parasite Associations:  
787 Mycophagous *Drosophila* and Their Parasitic Nematodes. *Am. Nat.* 160:S23–S39.
- 788 Jain M, Olsen HE, Paten B, Akeson M. 2016. The Oxford Nanopore MinION: Delivery of  
789 nanopore sequencing to the genomics community (2016). *Genome Biol.* 17:1–11.
- 790 Karasov T, Messer PW, Petrov D a. 2010. Evidence that adaptation in *Drosophila* is not limited  
791 by mutation at single sites. *PLoS Genet.* 6:e1000924.
- 792 Katoh K, Misawa K, Kuma K, Miyata T. 2002. MAFFT: a novel method for rapid multiple  
793 sequence alignment based on fast Fourier transform. *Nucleic Acids Res.* 30:3059–3066.
- 794 Keshishian H, Chiba A, Chang TN, Halfon MS, Harkins EW, Jarecki J, Wang L, Anderson M,  
795 Cash S, Halpern ME, et al. 1993. Cellular mechanisms governing synaptic development in  
796 *Drosophila melanogaster*. *J. Neurobiol.* 24:757–787.
- 797 Kimbrell DA, Beutler B. 2001. The evolution and genetics of innate immunity. *Nat Rev Genet*  
798 2:256–267.
- 799 Koren S, Walenz BP, Berlin K, Miller JR, Bergman NH, Phillippy AM. 2016. Canu : scalable  
800 and accurate long-read assembly via adaptive k-mer weighting and repeat separation. :1–35.
- 801 Lewis SH, Quarles KA, Yang Y, Tanguy M, Frézal L, Smith SA, Sharma PP, Cordaux R, Gilbert  
802 C, Giraud I, et al. 2018. Pan-arthropod analysis reveals somatic piRNAs as an ancestral  
803 defence against transposable elements. *Nat. Ecol. Evol.* 2:174–181.
- 804 Li H, Durbin R. 2009. Fast and accurate short read alignment with Burrows-Wheeler transform.  
805 *Bioinformatics* 25:1754–1760.
- 806 Lively CMCM. 1996. Host-parasite coevolution and sex. *Bioscience* 46:107–114.
- 807 Löytynoja A. 2014. Phylogeny-aware alignment with PRANK. In: Russell DJ, editor. *Multiple*  
808 *Sequence Alignment Methods*. Totowa, NJ: Humana Press. p. 155–170.
- 809 Magwire MM, Bayer F, Webster CL, Cao C, Jiggins FM. 2011. Successive increases in the  
810 resistance of *Drosophila* to viral infection through a transposon insertion followed by a  
811 duplication. *PLoS Genet.* 7:1–11.
- 812 Magwire MM, Fabian DK, Schweyen H, Cao C, Longdon B, Bayer F, Jiggins FM. 2012.  
813 *Genome-Wide Association Studies Reveal a Simple Genetic Basis of Resistance to*  
814 *Naturally Coevolving Viruses in *Drosophila melanogaster**. *PLoS Genet.* 8:1–11.
- 815 Markow TA, O’Grady P. 2006. *Drosophila: a guide to species identification*.

- 816 Martinez J, Longdon B, Bauer S, Chan YS, Miller WJ, Bourtzis K, Teixeira L, Jiggins FM.  
817 2014. Symbionts commonly provide broad spectrum resistance to viruses in insects: A  
818 comparative analysis of *Wolbachia* strains. PLoS Pathog. 10:e1004369.
- 819 Martinson VG, Douglas AE, Jaenike J. 2017. Community structure of the gut microbiota in  
820 sympatric species of wild *Drosophila*. Ecol. Lett. 20:629–639.
- 821 McCoy RC, Taylor RW, Blauwkamp TA, Kelley JL, Kertesz M, Pushkarev D, Petrov DA,  
822 Fiston-Lavier AS. 2014. Illumina TruSeq synthetic long-reads empower de novo assembly  
823 and resolve complex, highly-repetitive transposable elements. PLoS One 9.
- 824 McKenna A, Hanna M, Banks E, Sivachenko A, Cibulskis K, Kernytsky AM, Garimella K V,  
825 Altshuler D, Gabriel SB, Daly MJ, et al. 2010. The Genome Analysis Toolkit: A  
826 MapReduce framework for analyzing next-generation DNA sequencing data. Proc. Int.  
827 Conf. Intellect. Capital, Knowl. Manag. Organ. Learn. 20:1297–1303.
- 828 Merklings SH, van Rij RP. 2013. Beyond RNAi: Antiviral defense strategies in *Drosophila* and  
829 mosquito. J. Insect Physiol. 59:159–170.
- 830 Obbard DJ, Gordon KHJ, Buck AH, Jiggins FM. 2009. The evolution of RNAi as a defence  
831 against viruses and transposable elements. Philos. Trans. R. Soc. Lond. B. Biol. Sci.  
832 364:99–115.
- 833 Obbard DJ, Jiggins FM, Halligan DL, Little TJ. 2006. Natural Selection Drives Extremely Rapid  
834 Evolution in Antiviral RNAi Genes. Curr. Biol. 16:580–585.
- 835 Obbard DJ, Welch JJ, Kim KW, Jiggins FM. 2009. Quantifying adaptive evolution in the  
836 *Drosophila* immune system. PLoS Genet. 5:e1000698.
- 837 Palmer WH, Hadfield JD, Obbard DJ. 2018. RNA Interference Pathways Display High Rates of  
838 Adaptive Protein Evolution in Multiple Invertebrates. Genetics:genetics.300567.2017.
- 839 Palmer WH, Joosten J, Overheul GJ, Jansen PW, Vermeulen M, Obbard J, Rij RP Van. 2018.  
840 Induction and suppression of NF- $\kappa$ B signalling by a DNA virus of *Drosophila*.
- 841 Palmer WH, Medd N, Beard PM, Obbard DJ. 2018. Isolation of a natural DNA virus of  
842 *Drosophila melanogaster*, and characterisation of host resistance and immune responses.  
843 PLoS Pathog. 14:1–26.
- 844 Patterson JT, Stone WS. 1949. Studies in the genetics of *Drosophila*. Univ. Texas Publ. 4920:7–  
845 17.
- 846 Payne CC. 1974. The isolation and characterization of a virus from *Oryctes rhinoceros*. J. Gen.



- 847 Virol. 25:105–116.
- 848 Perlman SJ, Spicer GS, Dewayne Shoemaker D, Jaenike J. 2003. Associations between  
849 mycophagous *Drosophila* and their *Howardula* nematode parasites: A worldwide  
850 phylogenetic shuffle. Mol. Ecol. 12:237–249.
- 851 Pond S, Frost S, Muse S. 2005. HyPhy: hypothesis testing using phylogenies. Bioinformatics 21:  
852 676–679. :1–57.
- 853 Robinson MD, McCarthy DJ, Smyth GK. 2009. edgeR: A Bioconductor package for differential  
854 expression analysis of digital gene expression data. Bioinformatics 26:139–140.
- 855 Sabin LR, Zhou R, Gruber JJ, Lukinova N, Bambina S, Berman A, Lau CK, Thompson CB,  
856 Cherry S. 2009. Ars2 Regulates Both miRNA- and siRNA- Dependent Silencing and  
857 Suppresses RNA Virus Infection in *Drosophila*. Cell 138:340–351.
- 858 Sackton TB, Kulathinal RJ, Bergman CM, Quinlan AR, Dopman EB, Carneiro M, Marth GT,  
859 Hartl DL, Clark AG. 2009. Population Genomic Inferences from Sparse High-Throughput  
860 Sequencing of Two Populations of *Drosophila melanogaster*. Genome Biol. Evol. 1:449–  
861 465.
- 862 Sackton TB, Lazzaro BP, Schlenke TA, Evans JD, Hultmark D, Clark AG. 2007. Dynamic  
863 evolution of the innate immune system in *Drosophila*. Nat. Genet. 39:1461–1468.
- 864 Sansone CL, Cohen J, Yasunaga A, Xu J, Osborn G, Subramanian H, Gold B, Buchon N, Cherry  
865 S. 2015. Microbiota-dependent priming of antiviral intestinal immunity in *Drosophila*. Cell  
866 Host Microbe 18:571–581.
- 867 Dos Santos G, Schroeder AJ, Goodman JL, Strelets VB, Crosby MA, Thurmond J, Emmert DB,  
868 Gelbart WM, Brown NH, Kaufman T, et al. 2015. FlyBase: Introduction of the *Drosophila*  
869 *melanogaster* Release 6 reference genome assembly and large-scale migration of genome  
870 annotations. Nucleic Acids Res. 43:D690–D697.
- 871 Schulz MH, Zerbino DR, Vingron M, Birney E. 2012. Oases: Robust de novo RNA-seq  
872 assembly across the dynamic range of expression levels. Bioinformatics 28:1086–1092.
- 873 Sessegolo C, Burlet N, Haudry A, Biémont C, Vieira C, Tenaillon M, Hollister J, Gaut B,  
874 McClintock B, Mackay T, et al. 2016. Strong phylogenetic inertia on genome size and  
875 transposable element content among 26 species of flies. Biol. Lett. 12:521–524.
- 876 Shoemaker DD, Katju V, Jaenike J. 1999. *Wolbachia* and the evolution of reproductive isolation  
877 between *Drosophila recens* and *Drosophila subquinaria*. Evolution (N. Y). 53:1157–1164.

- 878 Shultz A, Sackton TB. 2019. Immune genes are hotspots of shared positive selection across birds  
879 and mammals. *Elife* 8:e41815.
- 880 Simão FA, Waterhouse RM, Ioannidis P, Kriventseva E V., Zdobnov EM. 2015. BUSCO:  
881 Assessing genome assembly and annotation completeness with single-copy orthologs.  
882 *Bioinformatics* 31:3210–3212.
- 883 Simms D, Cizdziel P, Chomczynski P. 1993. TRIzol: a new reagent for optimal single-step  
884 isolation of RNA. *Focus (Madison)*.:99–102.
- 885 Smit AFA, Hubley R. 2008. RepeatModeler Open-1.0. Available from: [www.repeatmasker.org](http://www.repeatmasker.org)  
886 Smit AFA, Hubley R. 2015. RepeatMasker Open-4.0.
- 887 Takeda K, Akira S. 2005. Toll-like receptors in innate immunity. *Int. Immunol.* 17:1–14.
- 888 Team RC. 2013. R: A Language and Environment for Statistical Computing. Available from:  
889 <http://www.r-project.org>
- 890 Teixeira L, Ferreira A, Ashburner M. 2008. The bacterial symbiont *Wolbachia* induces resistance  
891 to RNA viral infections in *Drosophila melanogaster*. *PLoS Biol.* 6:e2.
- 892 Unckless RL. 2011. A DNA Virus of *Drosophila*. *PLoS One* 6:e26564.
- 893 Unckless RL, Jaenike J. 2011. Maintenance of a Male-Killing *Wolbachia* in *Drosophila Innubila*  
894 By Male-Killing Dependent and Male-Killing Independent Mechanisms. *Evolution (N. Y).*  
895 66:678–689.
- 896 Valanne S, Wang J-H, Ramet M. 2011. The *Drosophila* Toll Signaling Pathway. *J. Immunol.*  
897 186:649–656.
- 898 Venkat A, Hahn MW, Thornton J. 2018. Multinucleotide mutations cause false inferences of  
899 lineage-specific positive selection. *Biorxiv* 2018:1–32.
- 900 Walker BJ, Abeel T, Shea T, Priest M, Abouelliel A, Sakthikumar S, Cuomo CA, Zeng Q,  
901 Wortman J, Young SK, et al. 2014. Pilon: An integrated tool for comprehensive microbial  
902 variant detection and genome assembly improvement. *PLoS One* 9.
- 903 Wang X-HX-H, Aliyari R, Li W-X, Li H-W, Kim K, Carthew R, Atkinson P, Ding S-W. 2006.  
904 RNA interference directs innate immunity against viruses in adult *Drosophila*. *Science (80-*  
905 *)*.312:452–454.
- 906 Wang Y, Jehle J a. 2009. Nudiviruses and other large, double-stranded circular DNA viruses of  
907 invertebrates: new insights on an old topic. *J. Invertebr. Pathol.* 101:187–193.
- 908 Webster CL, Waldron FM, Robertson S, Crowson D, Ferrari G, Quintana JF, Brouqui J-M,

- 909 Bayne EH, Longdon B, Buck AH, et al. 2015. The discovery, distribution, and evolution of  
910 viruses associated with *Drosophila melanogaster*. PLoS Biol. 13:e1002210.
- 911 West C, Silverman N. 2018. p38b and JAK-STAT signaling protect against invertebrate  
912 iridescent virus 6 infection in *Drosophila*. Plant Pathol.:1–22.
- 913 Wickham H. 2009. ggplot2: Elegant Graphics for Data Analysis. Springer-Verlag New York  
914 Available from: <http://ggplot2.org>
- 915 Wu TD, Nacu S. 2010. Fast and SNP-tolerant detection of complex variants and splicing in short  
916 reads. Bioinformatics 26:873–881.
- 917 Xie Y, Wu G, Tang J, Luo R, Patterson J, Liu S, Huang W, He G, Gu S, Li S, et al. 2014.  
918 SOAPdenovo-Trans: De novo transcriptome assembly with short RNA-Seq reads.  
919 Bioinformatics 30:1660–1666.
- 920 Yang Z. 2007. PAML 4: Phylogenetic analysis by maximum likelihood. Mol. Biol. Evol.  
921 24:1586–1591.
- 922 Ye K, Schulz MH, Long Q, Apweiler R, Ning Z. 2009. Pindel : a pattern growth approach to  
923 detect break points of large deletions and medium sized insertions from paired-end short  
924 reads. Bioinformatics 25:2865–2871.
- 925 Zambon RA, Nandakumar M, Vakharia VN, Wu LP. 2005. The Toll pathway is important for an  
926 antiviral response in *Drosophila*. Proc. Natl. Acad. Sci. 102:7257–7262.
- 927 Zhang H, Meltzer P, Davis S. 2013. RCircos : an R package for Circos 2D track plots.
- 928 Zhou Q, Bachtrog D. 2015. Ancestral Chromatin Configuration Constrains Chromatin Evolution  
929 on Differentiating Sex Chromosomes in *Drosophila*. PLoS Genet. 11:1–21.
- 930 Zhou Q, Zhu H, Huang Q, Zhao L, Zhang G, Roy SW, Vicoso B, Xuan Z, Ruan J, Zhang Y, et  
931 al. 2012. Deciphering neo-sex and B chromosome evolution by the draft genome of  
932 *Drosophila albomicans*. BMC Genomics 13:109.
- 933

# A - Genome summary

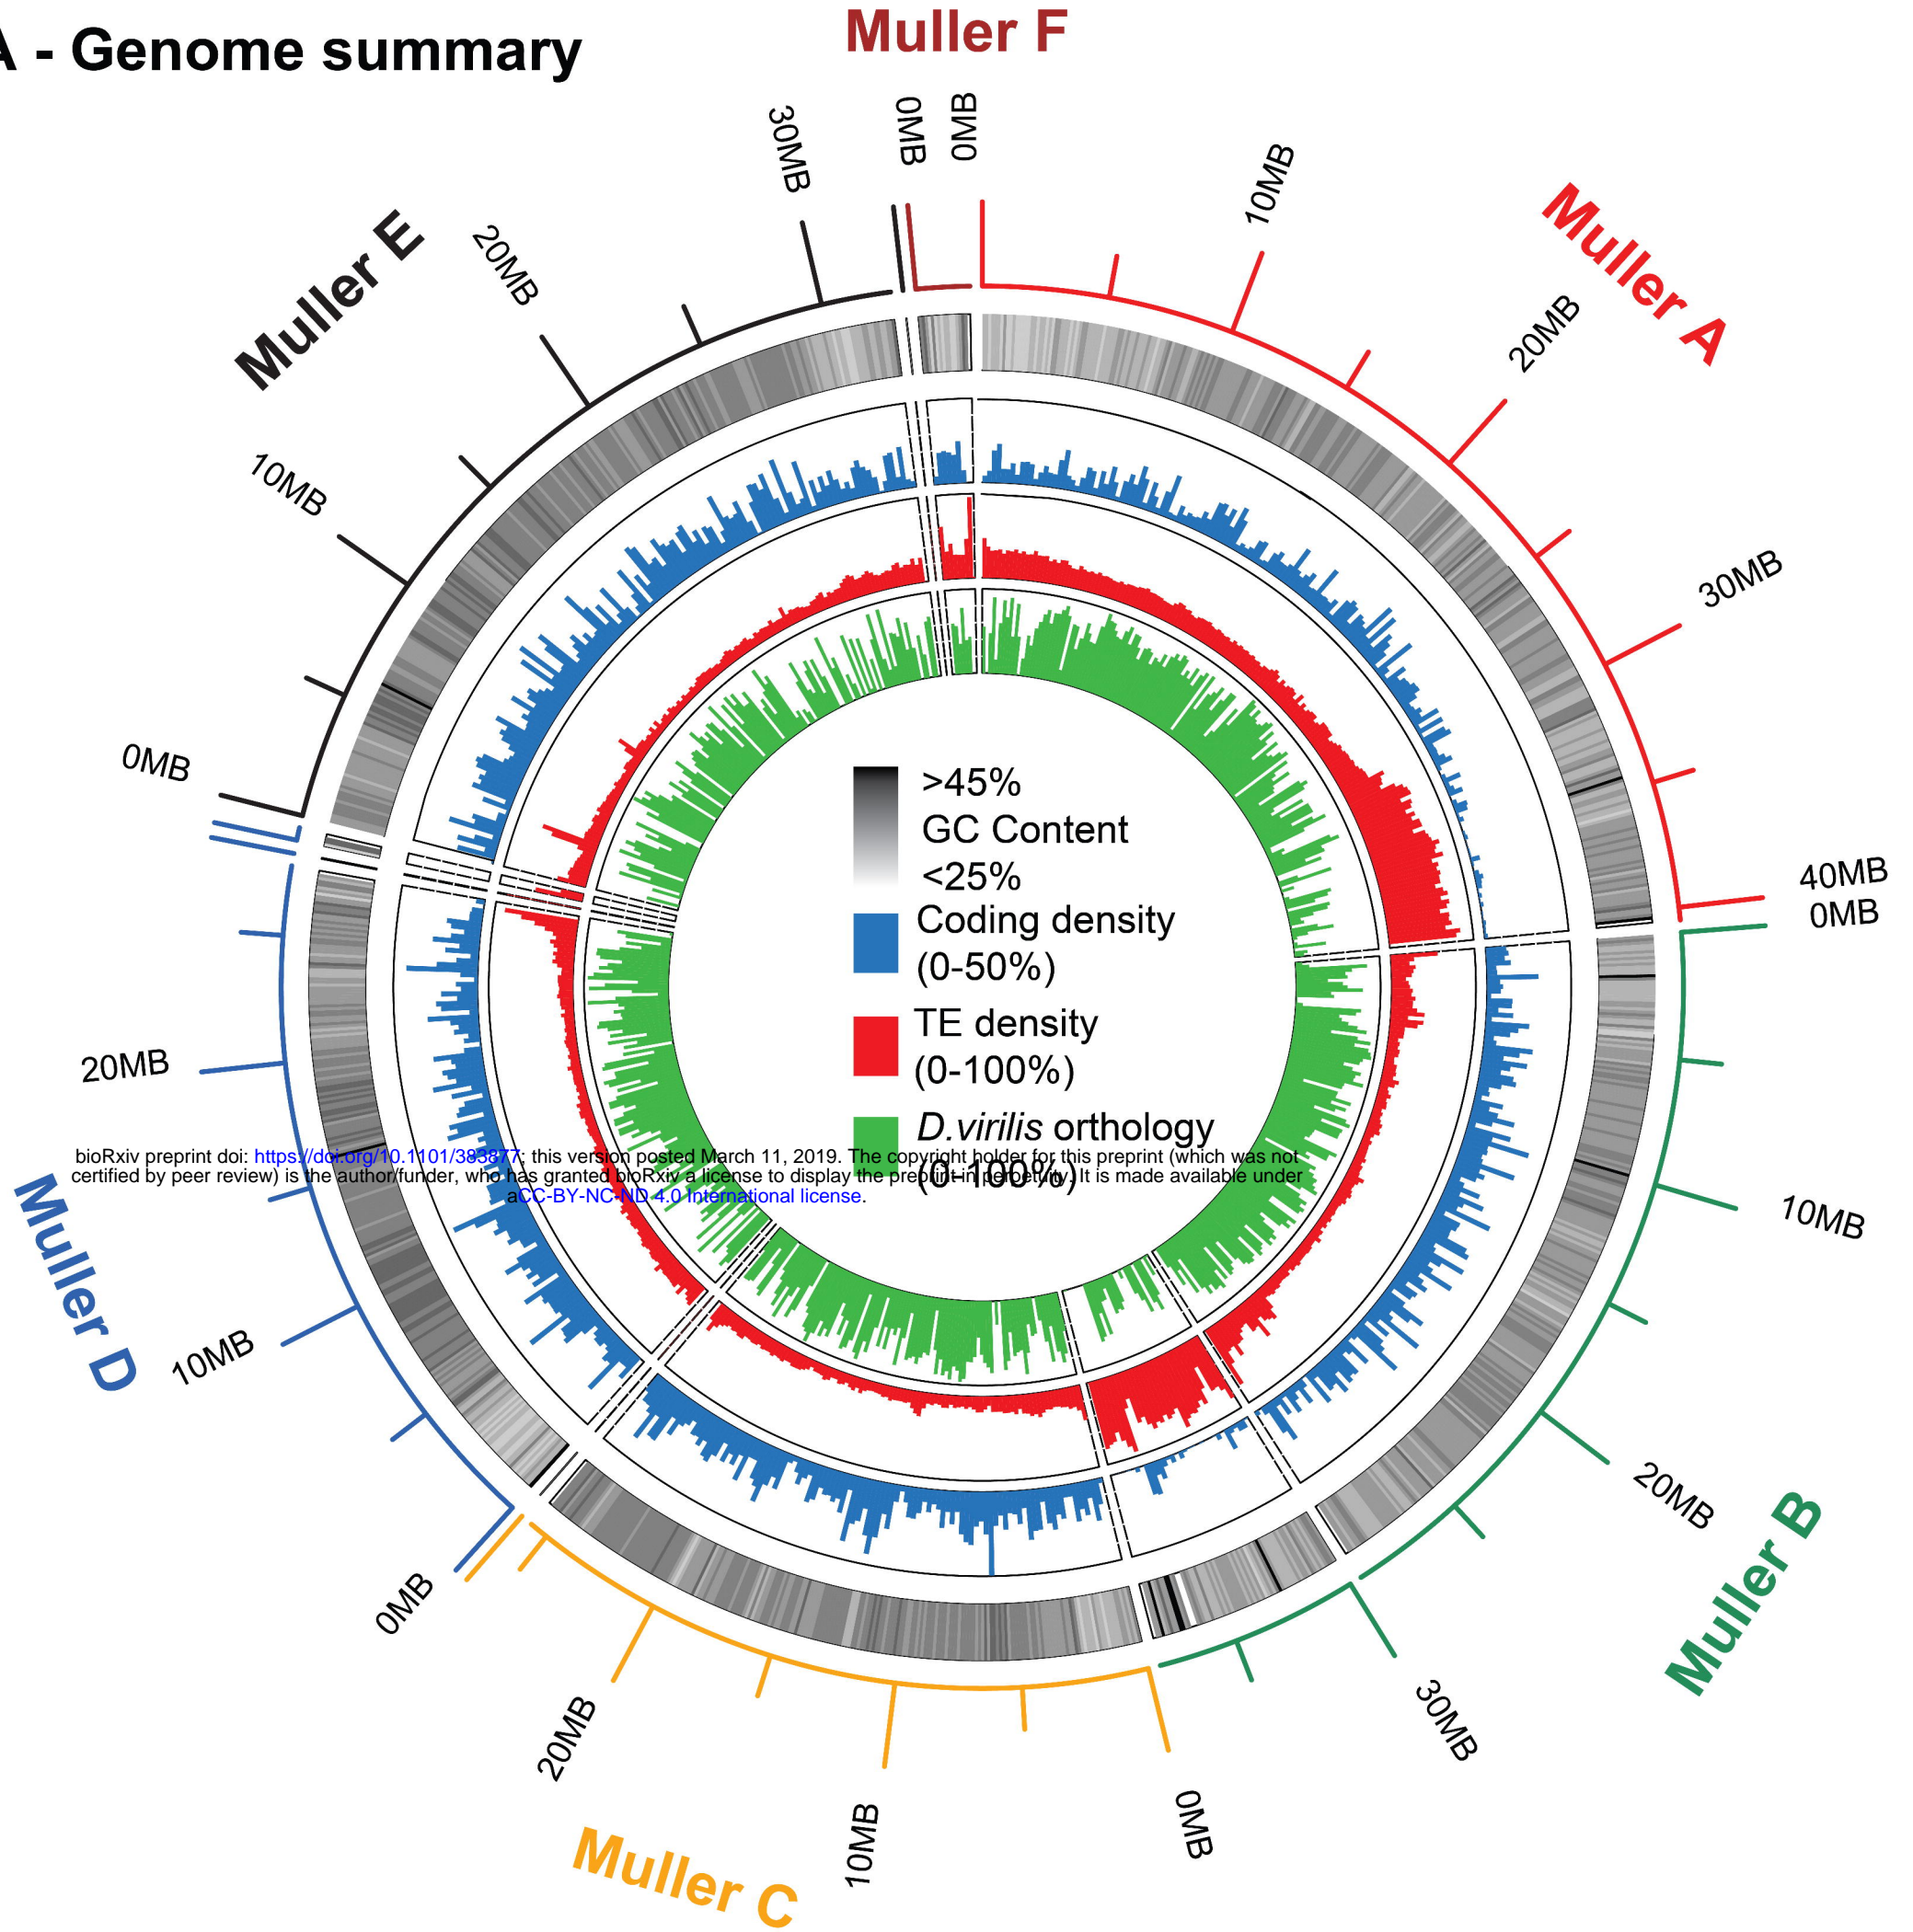

# B - Phylogeny

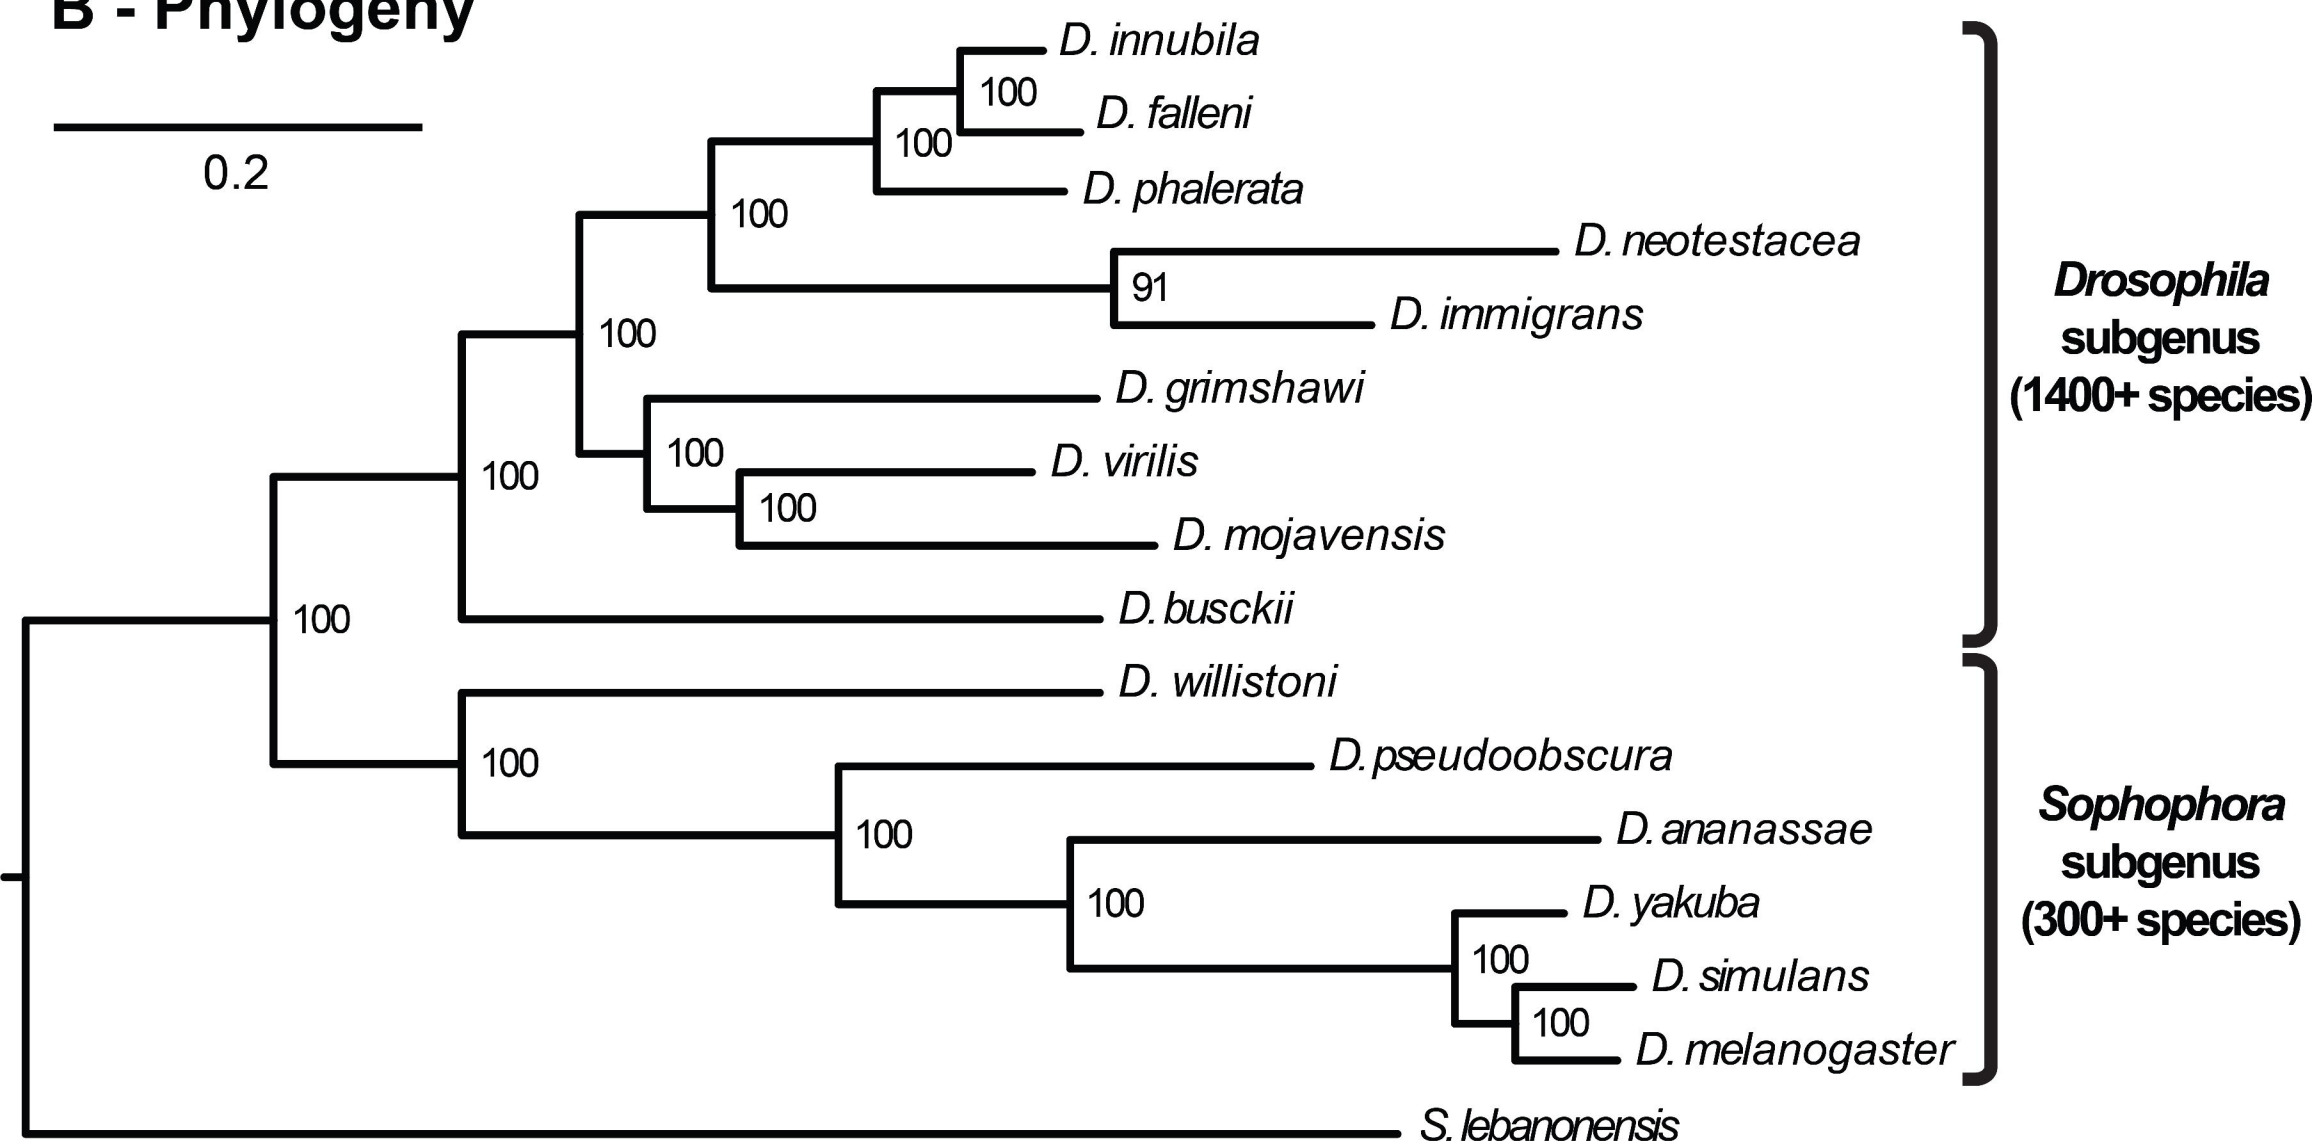

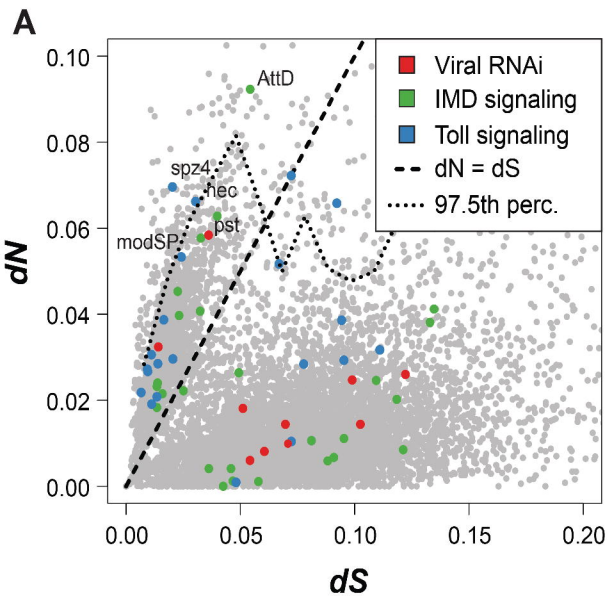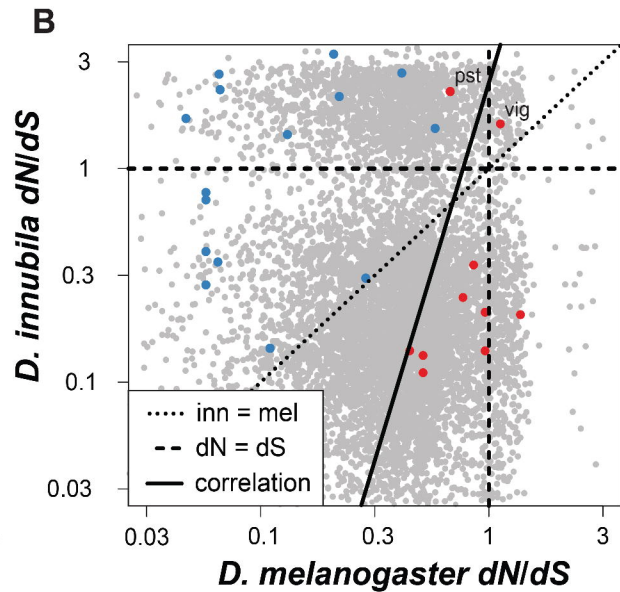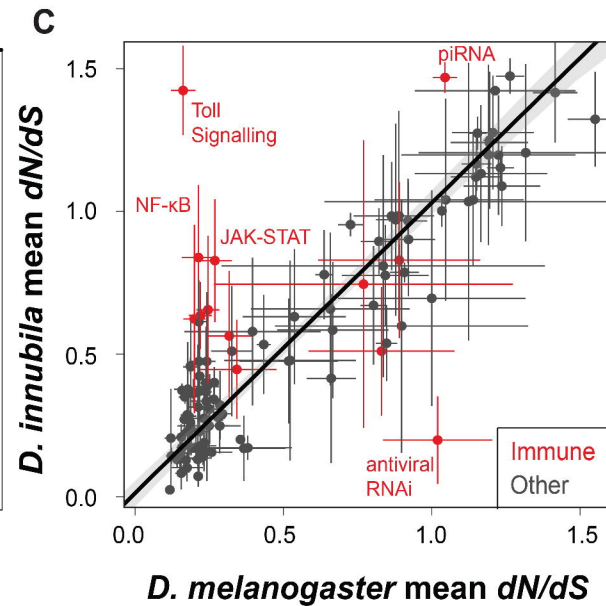

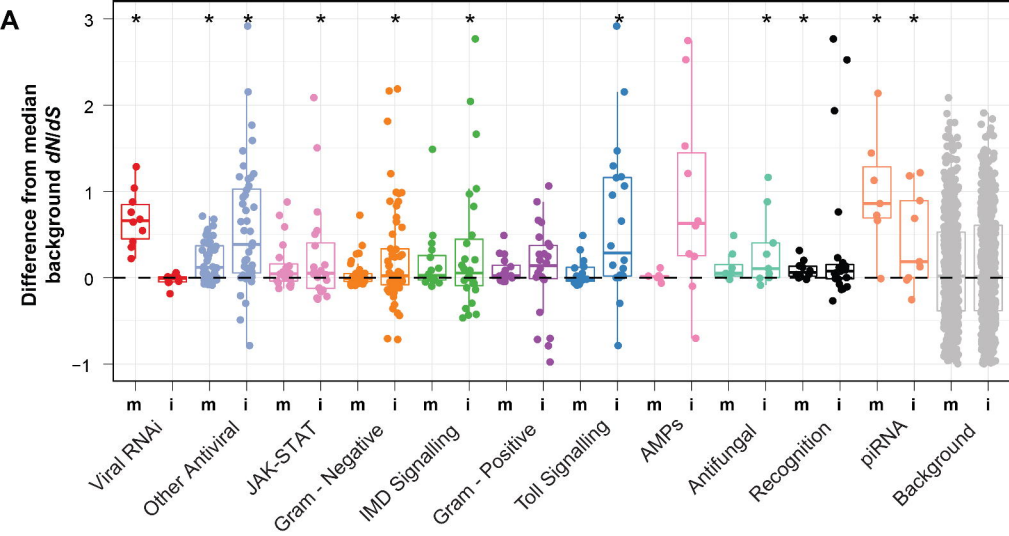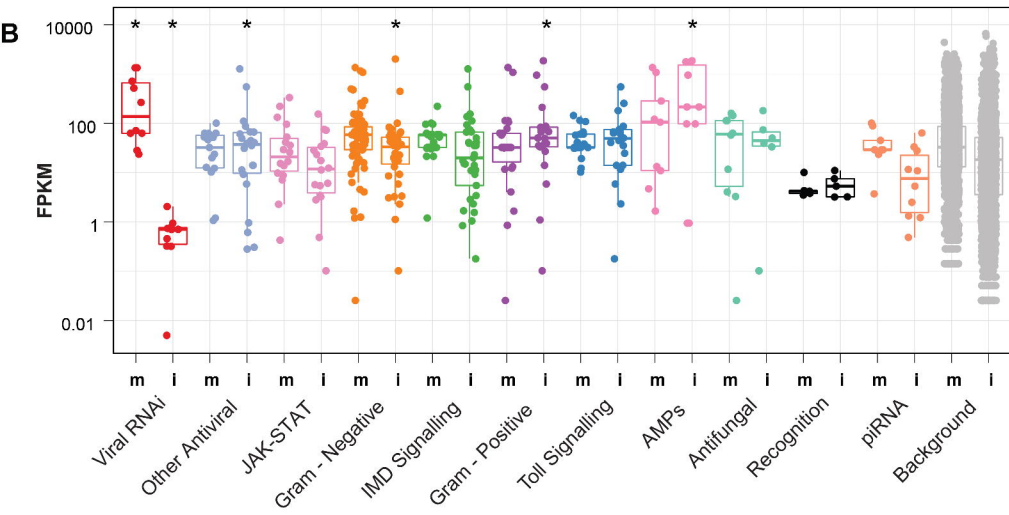

Source: https://www.biorxiv.org/content/10.1101/383877v2.full.pdf
